# Supplementary material
Source: PubMed Central journal article supplement (PMC6237456)
Supplement: jciinsight-3-122591-s147.pdf [file jciinsight-3-122591-s147.pdf]

- 1 **Supplementary Data Contents:**
- 2 **Supplemental Methods:** Antibody generation and immunohistochemical methods and scoring
- 3 **Supplementary Figure 1** The antibody C6D4 binds to the ligand-binding domain of mouse and human  
4  $\alpha v\beta 8$  and effectively inhibits L-TGF- $\beta$  binding to  $\alpha v\beta 8$
- 5 **Supplemental Figure 2:** Expression of PD-L1, PD-L2 and L-TGF- $\beta$  on LLC and MC38 cells
- 6 **Supplemental Figure 3:** TRAMP-C2 tumor growth is significantly inhibited by C6D4
- 7 **Supplemental Figure 4:** Host cells expressing  $\alpha v\beta 8$  do not affect wild-type LLC tumor growth
- 8 **Supplemental Figure 5:**  $\alpha v\beta 8$  expression increases  $\beta 8$ -LLC tumor vessel growth, promotes tumor cell  
9 survival and immune exclusion
- 10 **Supplemental Figure 6:** Vessel growth is independent of tumor size
- 11 **Supplemental Figure 7:** Apoptosis, proliferation and immune cell localization is not correlated with tumor  
12 size
- 13 **Supplemental Figure 8:** IFN $\gamma$  secreting CD4 $^{+}$  or TCR $\beta^{+}$  NK1.1 $^{+}$  or MDSC cells are not significantly  
14 increased in  $\beta 8$  LLC tumors from C6D4 treated mice
- 15 **Supplemental Figure 9:** Gating strategy for CD4 $^{+}$  Treg cells
- 16 **Supplemental Figure 10:** Gating strategy for IFN $\gamma$  secreting CD4 $^{+}$ , CD8 $^{+}$  T-cells, and NK cells
- 17 **Supplemental Figure 11:** Gating strategy for tumor-associated macrophages, g-MDSC and m-MDSC
- 18 **Supplemental Figure 12:** TGF- $\beta 1$  is expressed on the cell surface but not integrin  $\beta 8$  on tumor associated  
19 CD4 $^{+}$ , Treg from FoxP3-GFP mice
- 20 **Supplemental Figure 13:** The integrin  $\beta 8$  subunit is not expressed by tumor associated CD4 $^{+}$ , dendritic  
21 cells, or macrophages in humanized *ITGB8* BAC transgenic mice
- 22 **Supplementary Figure 14:** Expression of *ITGB8* across various human epithelial, neural and hematogenous  
23 and lymphoid-derived malignant cell lines
- 24 **Supplemental Figure 15:** Clone F9 specifically recognizes the integrin  $\beta 8$  subunit when expressed on  
25 transfected cells and in Western blots

1 **Supplemental Figure 16:** Clone F9 specifically recognizes the integrin  $\beta 8$  subunit and stains human and not  
2 mouse  $\beta 8$  in formalin-fixed paraffin embedded (FFPE) tissue

3 **Supplemental Figure 17:** Clone F9 stains  $\beta 8$  in normal human epithelial and neural-derived cell types. F9  
4 immunostaining of archival FFPE tissues

5 **Supplemental Figure 18:** Clone F9 does not stain  $\beta 8$  in stromal or immune cells in LLC tumors growing in  
6 humanized *ITGB8* BAC transgenic mice

7

8 **Supplemental Figure 19:** Full uncropped unedited immunoblot photomicrograph used for Supplemental  
9 Figure 15

10

11

12 **Supplemental Table 1:** Differentially expressed genes in tumor cells, tumor associated macrophages,  
13 CD8+, CD4+ T-cells

14 **Supplemental Table 2:** Gene Ontology Enrichment in tumor cells, tumor associated macrophages, CD8+,  
15 CD4+ T-cells

16

## 1 **Supplemental methods:**

### 2 ***Antibody Generation:***

3 **C6D4:** We engineered a potent antibody that inhibits  $\alpha v\beta 8$ -mediated activation of TGF- $\beta$  to test the role of  
4  $\alpha v\beta 8$  in cancer growth in preclinical murine models. To accomplish this, we sought to directly target an  
5 epitope shared by mouse and human within the ligand-binding pocket of  $\alpha v\beta 8$ . We engineered a mutant  
6  $\alpha v\beta 8$  integrin lacking the specificity-determining loop (SDL) of the human  $\beta 8$  subunit (a.a.195-222), which  
7 forms a key portion of the ligand-binding pocket and its primary sequence is entirely conserved between  
8 mouse and human (**Supplemental Figure 1A**). The SDL-deficient mutant was expressed as an  $\alpha v$ -associated  
9 heterodimer on the cell surface and folded correctly, as antibodies to the  $\beta$ -head domain (clone 68) and Psi  
10 domain (clone F9) both bound efficiently to the SDL-deficient mutant  $\alpha v\beta 8$  receptor (**Supplemental Figure**  
11 **1B**). The SDL was essential for ligand-binding and function since CHO cells expressing the SDL-deficient  
12  $\beta 8$  mutant did not bind to a TGF- $\beta$  peptide containing the RGD binding motif or support TGF- $\beta$  activation  
13 (**Supplemental Figure 1C**). We used antibody engineering to create a recombinant antibody called C6D4,  
14 which bound to the SDL domain and was positioned to directly interfere with binding of L-TGF- $\beta$  to  $\alpha v\beta 8$ ,  
15 as visualized using negative-staining electron microscopy (**Supplemental Figure 1D**).

16 Thus, *ITGB8* +/- mice maintained on C57B/6 were backcrossed to the LCR outbred strain to  
17 produce live born *ITGB8* -/- mice. Mice were immunized with recombinant human  $\alpha v\beta 8$  protein for the  
18 primary injection and then at 2 weeks and at 3 weeks prior to euthanasia. Approximately 5000 hybridomas  
19 were generated and screened for their ability to bind to  $\alpha v\beta 8$  in an enzyme-linked immunosorbent assay  
20 (ELISA). Results were confirmed by cell staining, and function blocking was determined with the use of a  
21 TGF- $\beta$  bioassay. We identified 24 hybridomas that blocked the ability of the  $\alpha v\beta 8$  ectodomain to bind to the  
22 latency-associated peptide of TGF- $\beta 1$  and blocked TGF- $\beta$  activation in a TGF- $\beta$  (TMLC) bioassay. Blocking  
23 antibodies were screened against the recombinant form of  $\alpha v\beta 8$  engineered to lack the specificity-  
24 determining loop (SDL) of the  $\beta 8$  head domain. Antibodies not binding the SDL-deficient  $\alpha v\beta 8$  were then  
25 selected. Of these, 8 hybridomas produced  $\beta 8$ -specific antibodies that did not bind to the cells expressing the  
26  $\beta 8$  SDL-deficient construct. Variable (V) genes from eight hybridomas were isolated, sequenced, and found  
27 to comprise seven  $V_H$  and eleven  $V_K$  genes that were unique but related. Each V gene was amplified under  
28 mutagenic PCR conditions, and a single-chain variable fragment (scFV) library was constructed by mixing  
29 the amplified cDNA and fragments joined using splice overlap. The library served as an amplification  
30 template using primers designed to complement rabbit IgG  $V_H$  or  $V_L$  vectors. Eleven distinct  $V_H$  genes and  
31 sixteen distinct  $V_K$  genes were identified after sequencing >100 random clones and transfected in 165  
32 different combinations into 293 cells. The eight pairs that produced the best binders were determined by cell

1 staining and FACS analysis, and by measuring binding affinity for CHO cells expressing human  $\alpha v \beta 8$ . These  
2 eight rabbit IgG  $V_H/V_K$  pairs were then used to create a new mutagenic scFV yeast display library that was  
3 inserted into a yeast expression library vector. Two high-affinity binders from this selection and affinity  
4 maturation step were identified and designated clone 29 and clone 44. Random mutation mutagenic libraries  
5 were next made from  $V_H$  and  $V_L$  genes of clones 29 and 44, and from these libraries the higher-affinity  
6 binding clones C6 and D4 were selected and sequenced. Mutations in the complementarity-determining  
7 regions (CDRs) of C6  $V_H$  and D4  $V_K$  were identified, and the two chains were combined to create the  
8 composite antibody C6D4.

9 C6D4 exclusively recognized  $\alpha v \beta 8$  and not  $\alpha v \beta 1$ ,  $\alpha v \beta 3$ ,  $\alpha v \beta 5$  or  $\alpha v \beta 6$  (**Supplemental Figure**  
10 **1E**). C6D4 bound specifically to WT but not *itgb8* *-/-* mouse tracheal epithelial cells, demonstrating both its  
11 specificity and recognition of mouse  $\beta 8$  (**Supplemental Figure 1F**). C6D4 potently inhibited both  $\alpha v \beta 8$ -  
12 mediated TGF- $\beta$  activation, compared to an earlier generation allosteric anti-human specific  $\alpha v \beta 8$  inhibitory  
13 antibody, B5, which maximally inhibits only 60% of  $\alpha v \beta 8$ -mediated TGF- $\beta$  activation (**Supplemental**  
14 **Figure 1G**) (1). A Kinetic Exclusion Assay (KINEXA  $\text{\textcircled{R}}$ , Sapidyne Instruments, Inc., Boise, ID) was used to  
15 measure the binding affinity of C6D4 to the ectodomain of  $\alpha v \beta 8$ . C6D4 bound in solution to the ectodomain  
16 of the  $\alpha v \beta 8$  integrin with an apparent affinity of 832 pM. Size exclusion chromatography and negative  
17 staining electron microscopy were performed essentially as previously described (1).

18 **F9:** We desired to create a robust, specific antibody suitable for staining human  $\beta 8$  in FFPE, to determine the  
19 cell-type distribution of  $\alpha v \beta 8$  in human tissues. We used antibody engineering create an antibody, clone F9.  
20 Thus, a yeast display scFV library was created using V-genes from hybridoma clones 6B9 and 4F1, a new  
21 clone 6B9.1 was selected from this library. A second yeast display scFV library was created using the V-  
22 genes of 6B9.1 and following random PCR mutagenesis, sixteen affinity-matured variants from this second  
23 library were characterized in terms of binding affinity and two clones C4 and D10 were transformed in to  
24 rabbit IgG format. Both reacted weakly with human  $\beta 8$  in formalin-fixed paraffin-embedded tissue. A third  
25 mutagenic scFV library was then created from the variable regions of C4 and D10 and inserted in a phage  
26 display vector (pHen) and displayed as scFv on the phage surface. The induced phage library was screened  
27 against formalin fixed immobilized  $\alpha v \beta 8$ . After multiple rounds of selection, fifteen related phage clones  
28 were identified and the final clone F9 was chosen and transformed into IgG format and characterized for  
29 binding to formalin-fixed paraffin embedded tissues.

30 F9 recognizes a human-specific epitope that specifically stains cells transfected with  $\alpha v \beta 8$  but not  
31 mock transfected cells and strongly detects a band of the appropriate size on Western blot (**Supplemental**  
32 **Figure 15**). F9 stains formalin fixed paraffin embedded (FFPE) tissues of mice humanized for the  $\beta 8$

1 integrin subunit (1) but not wild-type mice (**Supplemental Figure 16**). The main tissues expressing  $\beta 8$  in the  
2 humanized mice are neural, epithelial (bronchial, pancreatic, bile duct, intestinal crypt, kidney glomerular  
3 podocyte) with no detectable expression in hepatocytes, myocytes, mesenchymal or immune cell  
4 compartments (**Supplemental Figure 16**). This pattern of distribution is reproduced in normal human tissues  
5 (**Supplemental Figure 17**).

6 ***Immunostaining protocol:***

7 ***Tumor immunostaining:*** Formalin-fixed paraffin-embedded (FFPE) tissue sections were deparaffinized, and  
8 antigen retrieval was performed using either 0.4% (2)sin (#P-7125, Sigma) at 37°C for 5 min in a water bath,  
9 a Tris-EDTA buffer, pH 9.0 in a pressure cooker (97°C for 20 min), Reveal Declocker (Biocare Medical,  
10 Pacheco, CA) in a pressure cooker (95°C for 20 min), or a combination of pepsin and Reveal Declocker  
11 steps, followed by treatment with peroxidase blocker (K4007, Dako). Non-specific binding was blocked with  
12 protein blocking solution (X0909, Dako) and Avidin/Biotin Blocking kit (004303, Thermo Fisher Scientific).  
13 Sections were stained with anti-mouse  $\beta 8$  (clone F9), B5 (anti-human  $\beta 8$  which does not work in FFPE  
14 immunostaining and thus used as isotype control), PD-L1 (E1L3N<sup>®</sup>) XP<sup>®</sup> Rabbit mAb (CST#13684) at  
15 1:200 dilution in TBS with 0.05% Tween-20 overnight at 4°C. E1L3N<sup>®</sup> has been shown to produce  
16 concordant staining with 22C3 the FDA approved companion diagnostic to pembrolizumab, CD31 (NB100-  
17 2284, Novus Biologicals, Littleton, CO), Ki-67 (00375, Bethyl Livingston, TX), CD4 (14976682,  
18 ebioscience, San Diego, CA), CD8 (14080882, ebioscience), F4/80 (MCA497B, BioRad, Hercules, CA)  
19 followed by detection with Biotin-SP conjugated anti-rat IgG (Jackson ImmunoResearch, West Grove, PA  
20 712-065-153), anti-rabbit HRP (K4003, Dako), or streptavidin-HRP and DAB detection, as appropriate.  
21 TUNEL was performed according to the manufacturer's instructions (G3250, Promega, Madison, WI). For  
22 F9, the slides were additionally stained with labeled polymerase-HRP anti-mouse (Dako K4003) for 1 hr at  
23 RT, washed, and treated with Tyramide signal amplification solution A at a dilution of 1:100 (Life  
24 Technologies) according to the manufacturer's instructions. For PD-L1, stained slides were additionally  
25 treated with SignalStain<sup>®</sup>Boost IHC detection reagent (CST#8114) for 1 hr at RT.

26 ***Immunohistochemical scoring:*** All samples were blinded as to group, isotype, or test antibody. Digital  
27 images of blinded tumor groups were taken (Spot Imaging) and assessed for staining. For human samples,  
28 digital images of isotype or F9/PD-L1 were taken (5/tumor at 200x) and assessed for F9 and PD-L1  
29 positivity using PD-L1 scoring criteria (3). Briefly, tumor cells with membrane staining were counted and  
30 compared to numbers of tumor cells without membrane staining and tumor proportion score (TPS)  
31 determined as stained cells/total tumor cells (4). Ambiguous staining results (i.e. faint membrane staining, or  
32 heavy background) were resolved by comparison to isotype stained slides. For mouse tumors, vascular

1 density (number of vessels/field) and vessel branch points (branch points/mm<sup>2</sup>) were determined as described  
2 (5). Tumor infiltrating lymphocytes were assessed from 5 random digital images (Spot Imaging) taken from  
3 the periphery or central area of each tumor. The periphery of the tumor was defined as areas stained with ink  
4 prior to fixation and embedding, and/or showing entrapped adipocytes, skeletal muscle or skin appendages,  
5 and the central area defined as areas at least three contiguous 200X magnification fields from the periphery.  
6 The mean immune cell count was determined from cell number/mm<sup>2</sup>, as described (6).

7

1  
2

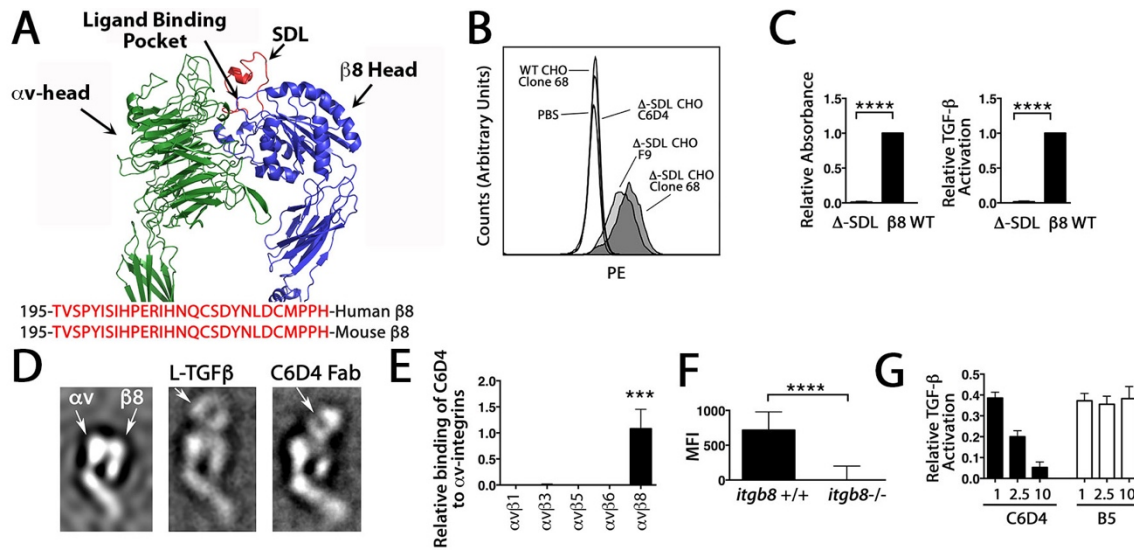

3 **Supplemental Figure 1: The antibody C6D4 binds to the ligand-binding domain of mouse and human**  
 4  **$\alpha$ v $\beta$ 8 and effectively inhibits L-TGF- $\beta$  binding to  $\alpha$ v $\beta$ 8** **A)** Ribbon model of the  $\alpha$ v $\beta$ 8 headpiece  
 5 homology-modeled (Chimera v1.12) from the  $\alpha$ v $\beta$ 3 crystal structure [Protein Data Bank (PDB)  
 6 3IJE](7) showing the  $\alpha$ v-(green) and  $\beta$ 8-(blue) head domains and the  $\beta$ 8-specificity determining loop (SDL,  
 7 red) forming a portion of the ligand-binding pocket. Depiction rendered in PyMOL (PyMOL v1.8.4.0). The  
 8 position and amino acid sequence of mouse and human SDL are shown below in red typeface. **B)** A mutant  
 9 construct lacking the  $\beta$ 8-SDL ( $\Delta$ -SDL) was heterologously expressed on CHO cells and was recognized by  
 10 domain specific antibodies (Clone 68,  $\beta$ I domain; F9, Psi domain) but not the anti- $\beta$ 8 antibody, C6D4, which  
 11 was engineered to bind to the  $\beta$ 8 SDL. **C)** The ability of CHO cells expressing  $\Delta$ -SDL to adhere to a peptide  
 12 derived from the TGF- $\beta$ 3 integrin binding motif (**left panel**) or to mediate TGF- $\beta$  activation in a TGF- $\beta$   
 13 bioassay (**right panel**) were compared to CHO cells expressing wild-type (WT)  $\beta$ 8. Results were normalized  
 14 to expression levels as shown in **B**. **D)** Class averages of negative-staining electron microscopy of the  
 15 purified  $\alpha$ v $\beta$ 8 ectodomain alone (**left panel**), with bound L-TGF- $\beta$  (**middle panel**), or with a fragment of  
 16 antigen binding (Fab) of C6D4 (**right panel**). **E)** C6D4 binds exclusively to  $\alpha$ v $\beta$ 8. Soluble  $\alpha$ v $\beta$ 1,  $\alpha$ v $\beta$ 3,  
 17  $\alpha$ v $\beta$ 5,  $\alpha$ v $\beta$ 6, or  $\alpha$ v $\beta$ 8 were immobilized on ELISA plates (1  $\mu$ g/ml) and C6D4 binding assessed by sandwich  
 18 ELISA. Shown in binding relative to BSA coated wells. **F)** C6D4 binds to  $\beta$ 8 expressed by mouse tracheal  
 19 epithelial cells derived from WT (*itgb8*<sup>+/+</sup>, n=6) but not from *itgb8*<sup>-/-</sup> mice (n=3). **G)** C6D4 blocks  $\alpha$ v $\beta$ 8-  
 20 mediated TGF- $\beta$  activation by CHO cells stably transfected with a  $\beta$ 8 expression construct. C6D4-mediated  
 21 inhibition TGF- $\beta$  activation was compared to an allosteric anti-human  $\beta$ 8 antibody, B5, which maximally  
 22 blocks 60% of TGF- $\beta$  activation (1). All Experiments were repeated a minimum of three times. \*p<0.05,  
 23 \*\*p<0.01, \*\*\*p<0.001, \*\*\*\*p<0.0001 as determined by unpaired Student's t-test.

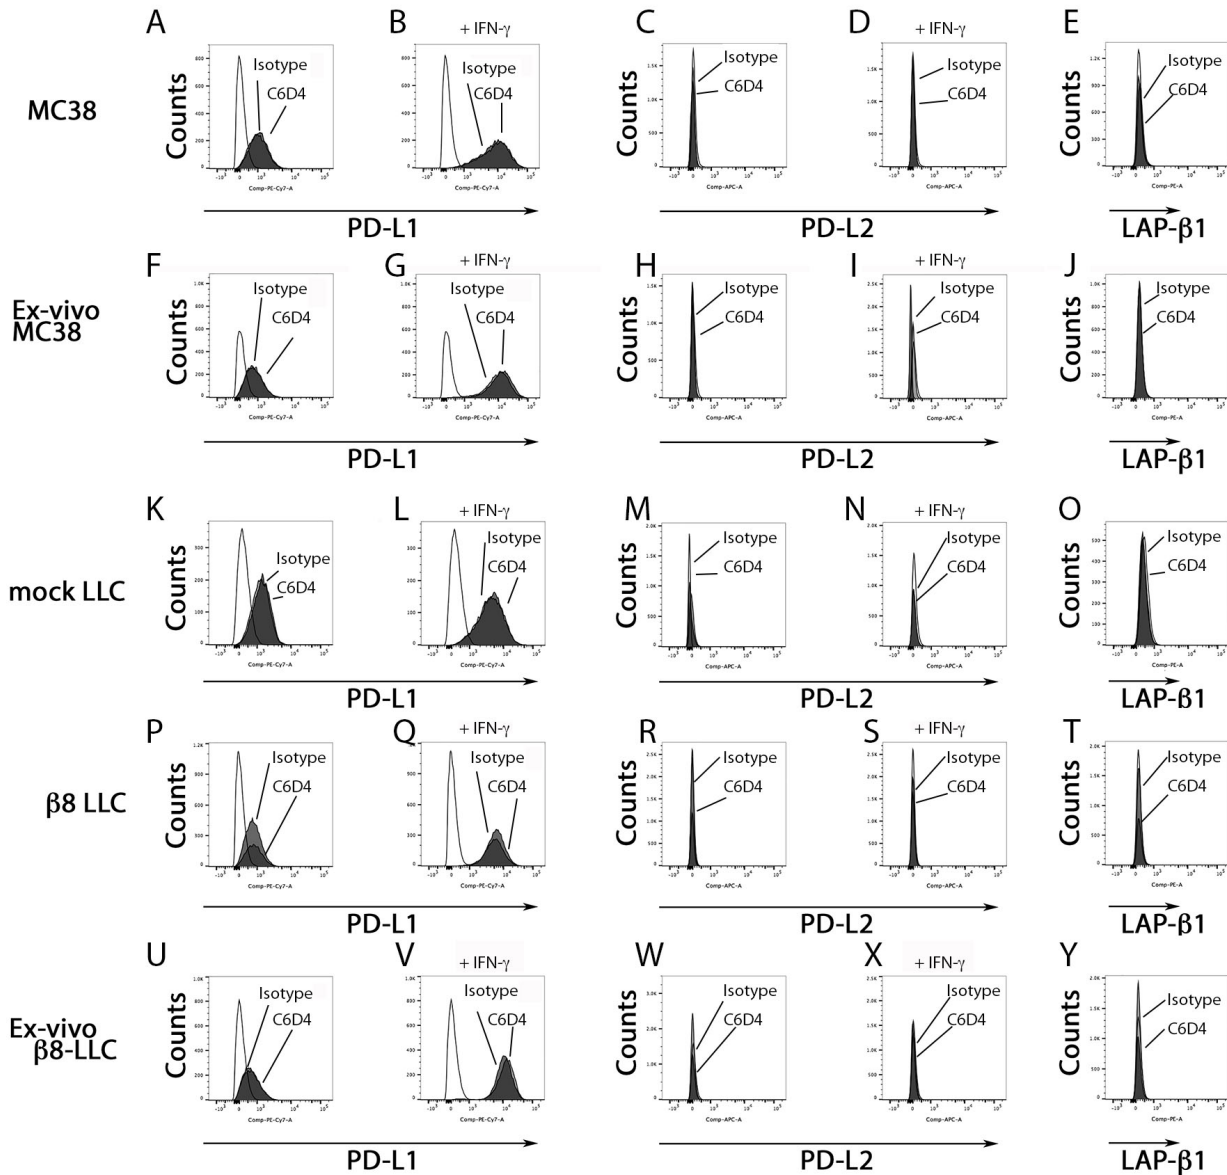

1 **Supplemental Figure 2: Expression of PD-L1, PD-L2 and L-TGF- $\beta$  on MC38 and LLC cells** MC38  
 2 Cells (A-E) or MC38 cells isolated from tumors (F-J), Mock transfected (K-O),  $\beta$ 8 LLC (P-T) or  $\beta$ 8 LLC  
 3 cells isolated from tumors (U-Y) were stained for A, B, F, G, K, L, P, Q, U, V) PD-L1; C, D, H, I, M, N, R,  
 4 S, W, X) PD-L2 ; and E, J, O, T, Y) LAP of L-TGF- $\beta$ 1 24 hr after treatment with isotype control (light  
 5 grey) or C6D4 (dark grey). B, D, G, I, L, N, Q, S, V, X) MC38 or  $\beta$ 8 LLC were treated for 24 hr with  
 6 recombinant IFN $\gamma$  ( 10 ng/ml)and isotype control (light grey) or C6D4 (dark grey) and stained for PD-L1.  
 7 Histogram overlays are shown with control antibody stained cells indicated by unfilled histograms. Shown  
 8 are representative histograms from at least 2 experiments (n  $\geq$  8 mice/group).

9



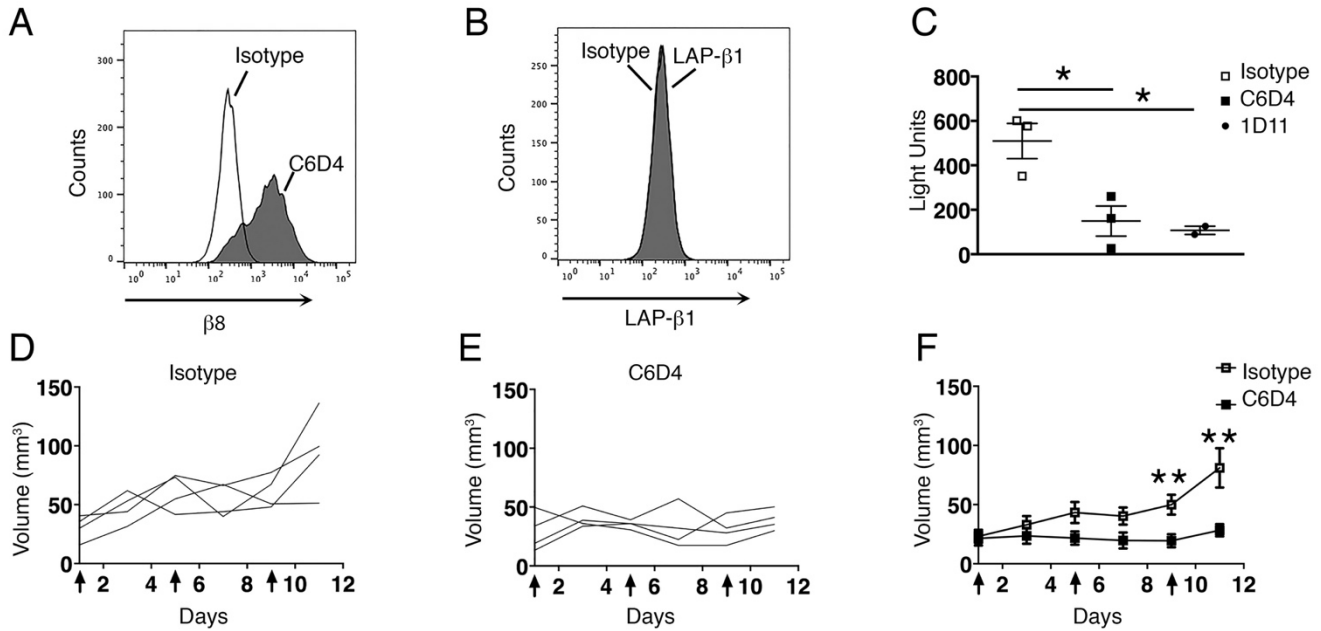

1 **Supplemental Figure 3: TRAMP-C2 tumor growth is significantly inhibited by C6D4** A) The murine  
2 prostatic adenocarcinoma line TRAMP-C2 expresses  $\alpha v \beta 8$ . TRAMP-C2 cells were stained for  $\alpha v \beta 8$  using C6D4  
3 (filled). Staining was compared to isotype stained TRAMP-C2 cells (open). Shown is a representative experiment of 3.  
4 B) The murine prostatic adenocarcinoma line TRAMP-C2 does not express cell surface latent TGF- $\beta 1$ . TRAMP-C2  
5 cells were stained for latent TGF- $\beta 1$  using an antibody to the latency associated peptide (LAP) of TGF- $\beta 1$  (filled).  
6 Staining was compared to isotype stained TRAMP-C2 cells (open). The histograms are superimposable indicating no  
7 detectable latent TGF- $\beta 1$  expression. Shown is a representative experiment of 3. C) TRAMP-C2 cells in culture  
8 activate TGF- $\beta$ . TRAMP-C2 cells were co-cultured with TMLC TGF- $\beta$  reporter cells in the presence of isotype (open  
9 squares), C6D4 (filled squares) or 1D11 (filled circles). All antibodies used at 10  $\mu$ g/ml. Activation is shown in  
10 arbitrary light units. Shown is an average of three experiments repeated in triplicate. D-F) TRAMP-C2 cells ( $10 \times 10^6$ )  
11 were injected into the flank of male C57BL/6 mice and after 17-19 days mice with palpable tumors were treated with  
12 D) C6D4 or E) isotype control (SV5) on days 0, 5 and 9 (7 mg/kg I.P.) as indicated by arrows. Shown are  
13 representative spider plots (D-E) of a representative of two experiments. In F) shown are tumor volume averages over  
14 time from two pooled experiments (n=8/group). Arrows indicate antibody injection days. \*\*p<0.01 by two-sided  
15 unpaired Student's t-test

16  
17

1

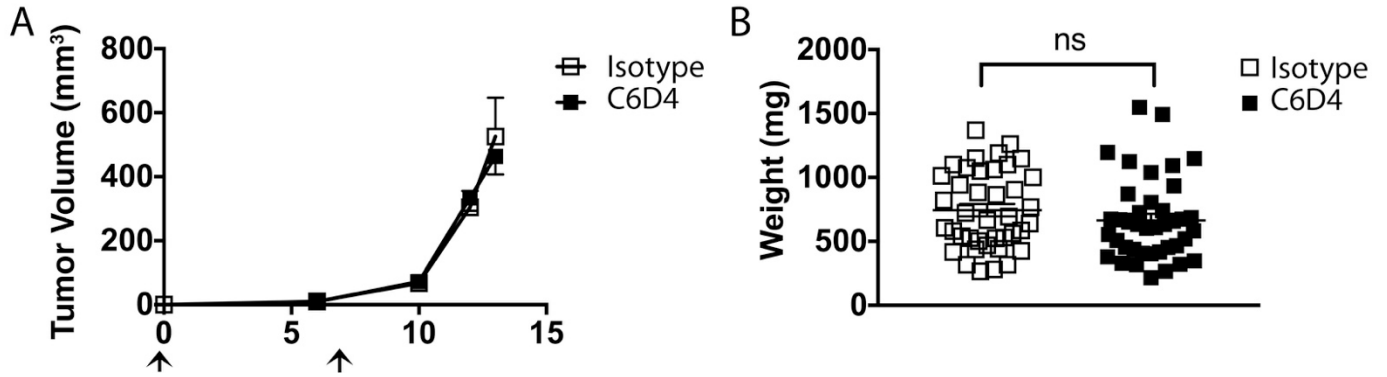

2

3 **Supplemental Figure 4: Host cells expressing  $\alpha\beta 8$  do not affect wild-type LLC tumor growth** Wild-  
4 type LLC cells were injected subcutaneously into female C57BL/6 mice and mice were injected with isotype control  
5 antibody or C6D4 (7 mg/kg I.P.) on days 0 and 7 (arrows). **A)** Average tumor volumes from a representative  
6 experiment of 4 (open squares, isotype, n=9; filled squares, C6D4, n=11). **B)** Individual tumor weights (day 14)  
7 depicted in scatterplot from 4 independent experiments from mice treated as shown in **A**. Open squares, isotype, n=40;  
8 filled squares, C6D4, n=40).

9

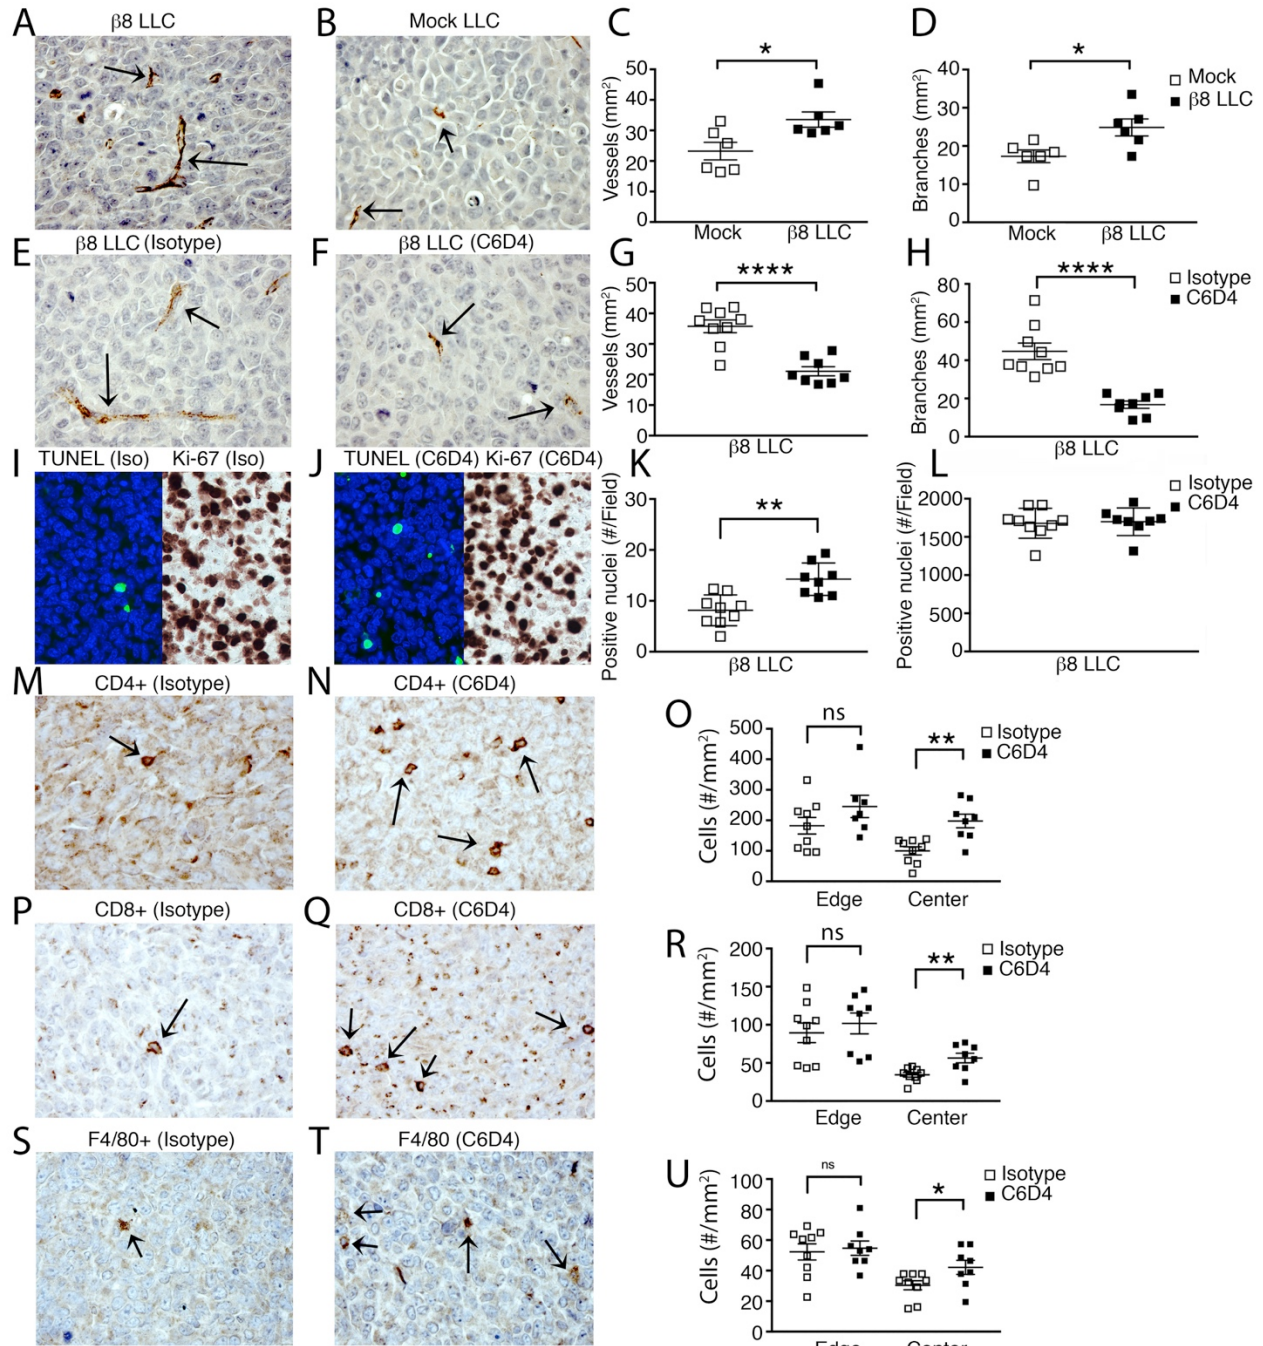

1

2 **Supplemental Figure 5:  $\alpha v \beta 8$  expression increases LLC tumor vessel growth, tumor cell survival and**  
 3 **immune exclusion** **A)**  $\beta 8$  LLC tumors or **B)** mock- LLC tumors were stained with anti-CD31 and **C)** vascular  
 4 density and **D)** vessel branching assessed morphometrically.  $\beta 8$  LLC tumors from mice treated with isotype **(E)** or  
 5 C6D4 **(F)** were stained with anti-CD31 and **G)** vascular density and **H)** vessel branching assessed morphometrically.  
 6  $\beta 8$  LLC tumors from mice treated with isotype **(I)** or C6D4 **(J)** were stained by TUNEL (left panels) or Ki-67 (right  
 7 panels) and assessed for apoptosis **(K)** or Ki-67 proliferation index **(L)**.  $\beta 8$  LLC tumors from mice treated with isotype  
 8 **(M, P, S)** or C6D4 **(N, Q, T)** were stained with anti-CD4 **(M, N)**, anti-CD8 **(P, O)**, or anti-F4/80 to stain macrophages  
 9 **(S, T)**. Representative positively stained immune cells are indicated by arrows. Quantification at tumor edge or center  
 10 from individual mice for CD4 **(O)**, CD8 **(R)** or F4/80 **(U)** are shown.  $n \geq 8$ . Significance was determined by unpaired  
 11 Student's t-test \* $p < 0.05$ , \*\* $p < 0.01$ , \* $p < 0.001$ , \*\*\*\* $p < 0.0001$

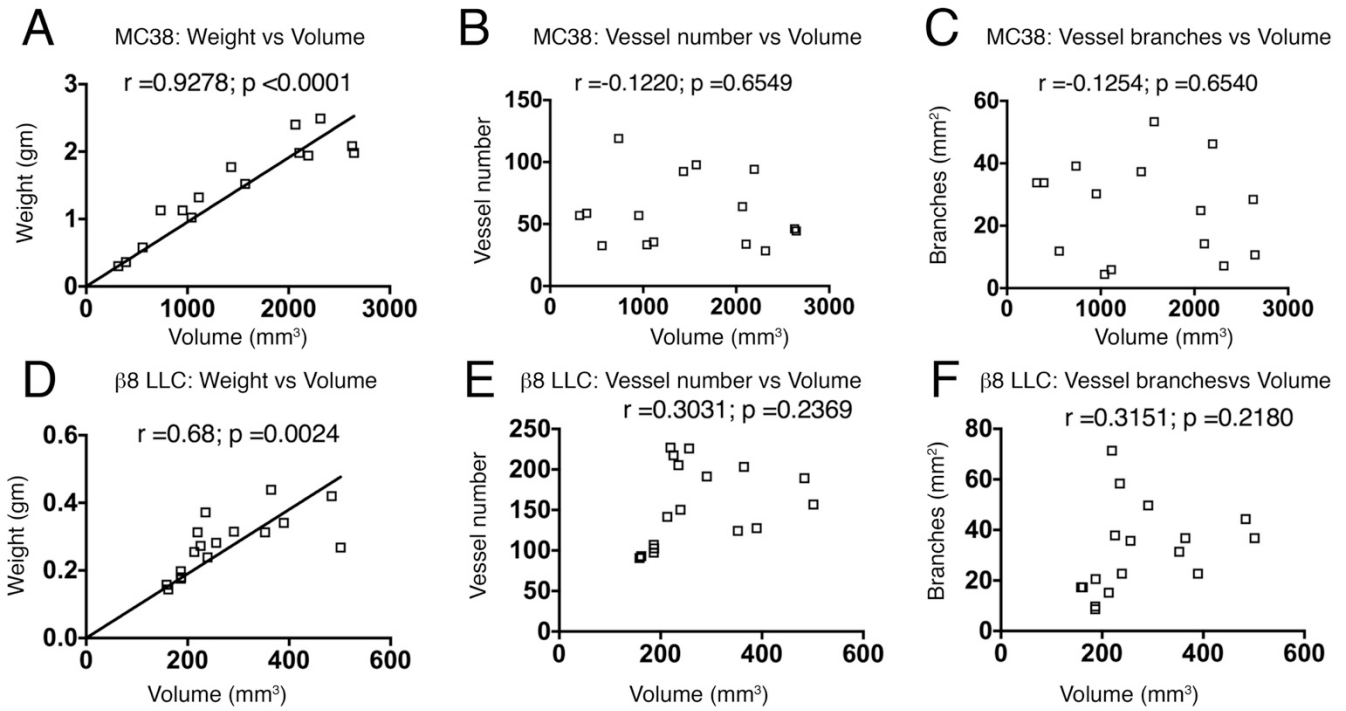

1

2 **Supplemental Figure 6: Vessel growth is independent of tumor size** Tumor volumes of MC38 (A-C) and  
 3  $\beta 8$  LLC tumors (D-F) harvested from mice in a representative experiment shown in **Figure 3** and **Supplemental**  
 4 **Figure 5** were compared with **A, D**) tumor weight, **B, E**) vessel density and **C, F**) branch points/mm<sup>2</sup>. Above each  
 5 graph are the Pearson  $r$  and corresponding  $p$  value. Only tumor weight is significantly correlated with volume.

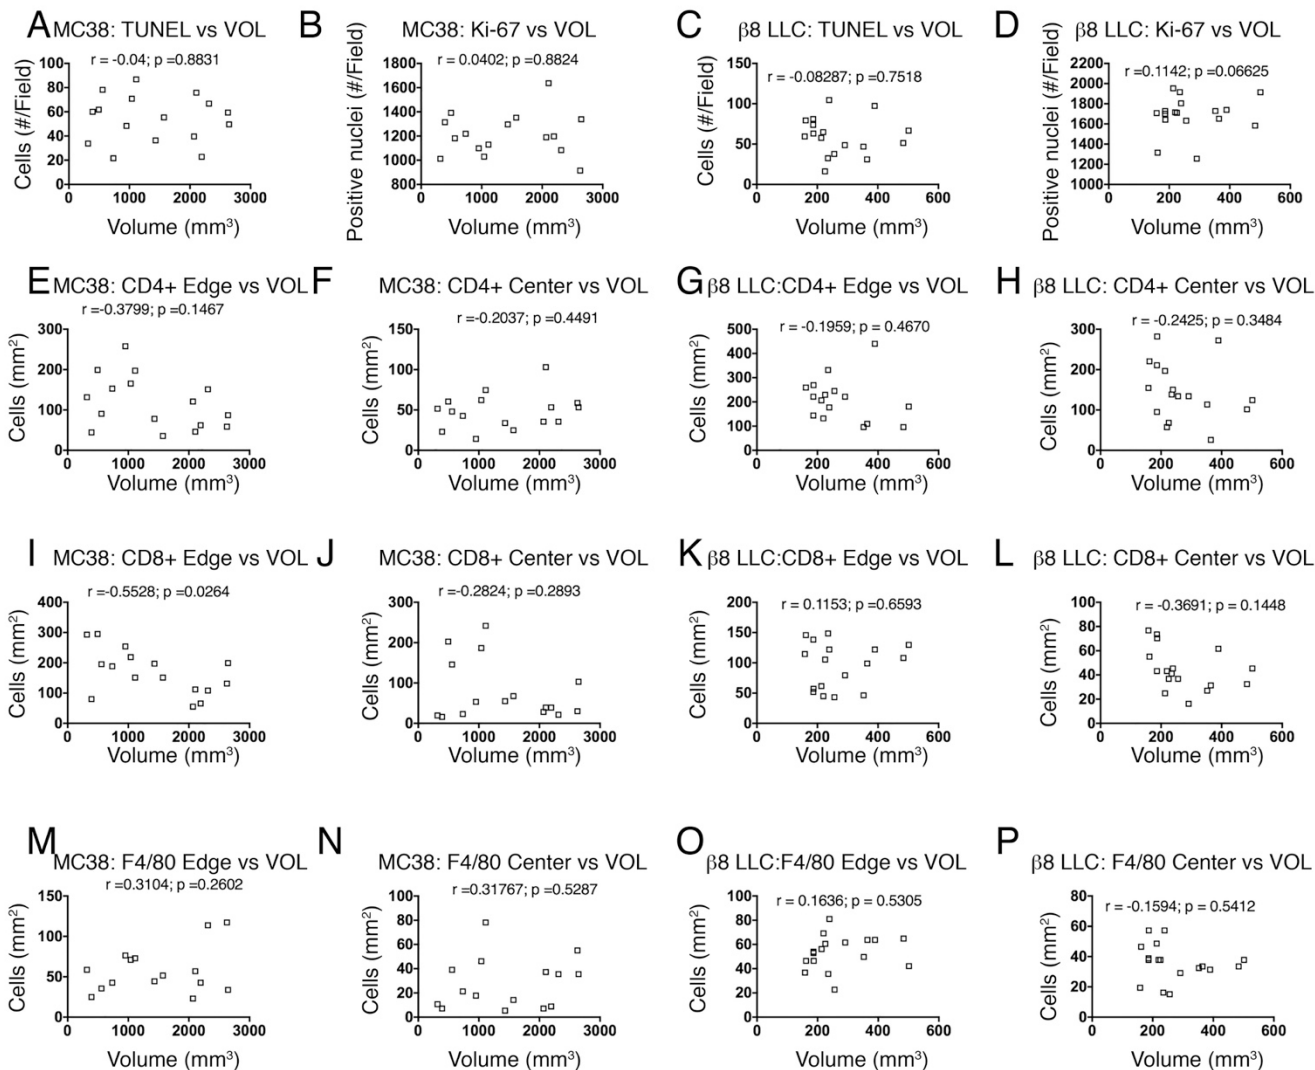

1

2 **Supplemental Figure 7: Apoptosis, proliferation and immune cell localization are not correlated with**  
 3 **tumor size** Tumor volumes of MC38 (A, B, E, F, I, J, M, N) and  $\beta 8$  LLC (C, D, G, H, K, L, O, P) tumors  
 4 from mice in a representative experiment shown in **Figure 3** were assessed for correlation with A, C)  
 5 TUNEL positive cells/HPF, B, D) Ki-67 positive cells/HPF, E, G) CD4+ cells at the tumor edge or F, H)  
 6 center. I, K) CD8+ cells at the tumor edge or J, L) center. M, O) F4/80 positive cells at the tumor edge or  
 7 center N, P). Above each graph are the Pearson r and corresponding p values. None of the endpoints  
 8 correlate with volume.

9

1

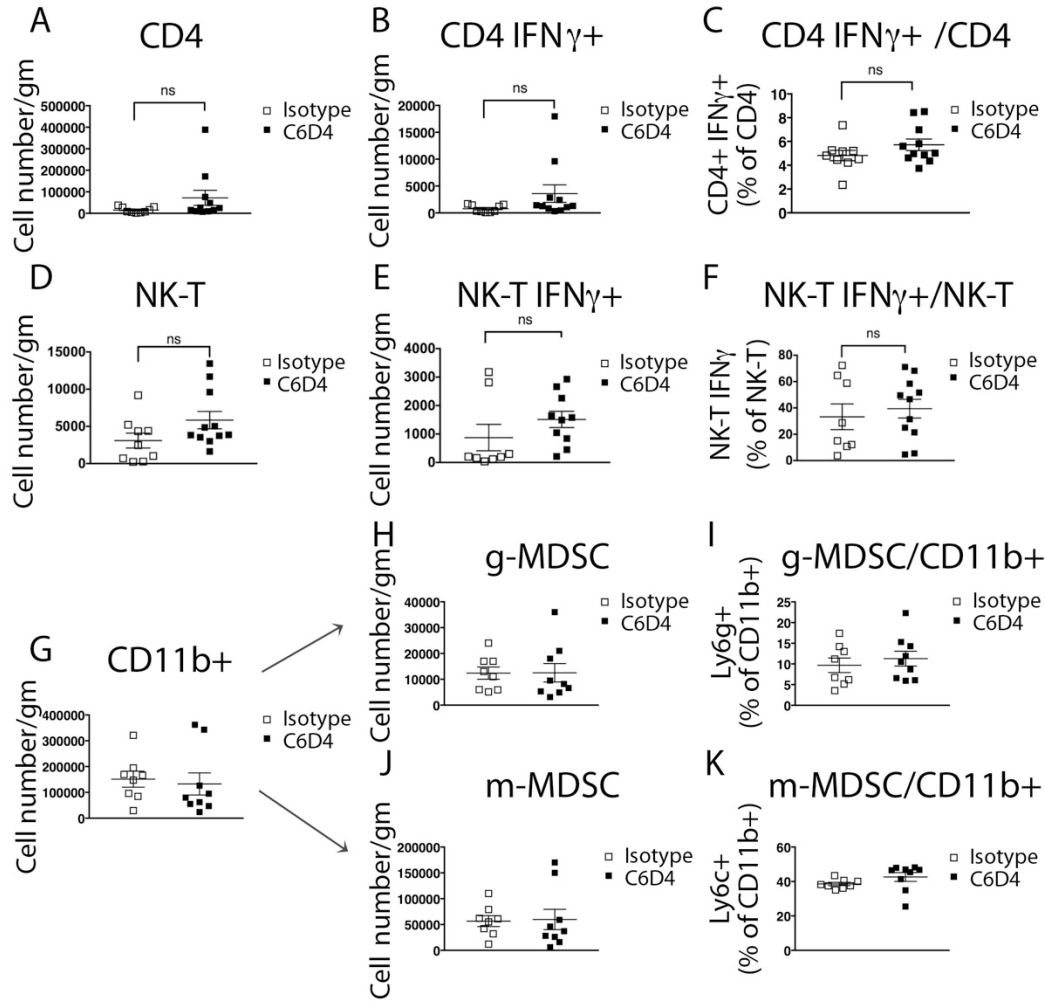

2

3 **Supplemental Figure 8: IFN $\gamma$  secreting CD4+ or TCR $\beta$ + NK1.1 + or MDSC cells are not significantly**  
 4 **increased in  $\beta$ 8 LLC tumors from C6D4 treated mice** Tumor infiltrating lymphoid cells from  $\beta$ 8-LLC tumors  
 5 harvested at day 14 post injection from mice treated with isotype or C6D4 (7 mg/kg) on days 0 and 7 underwent  
 6 multicolor cell staining and analysis. Tumor associated lymphoid cells isolated from tumors from mice treated with  
 7 isotype (open boxes) or C6D4 (closed boxes) are stained to identify numbers of CD4+ T-Cells (**A**) and IFN $\gamma$  secreting  
 8 CD4+ T-Cells (**B**), which were enumerated by size, CD45+, TCR $\beta$ +, NK1.1-, CD4+, IFN $\gamma$  surface capture positivity  
 9 relative to an isotype control (**A, B**) and percentages determined (**C**). Numbers of NK1.1+ TCR $\beta$ + NK1.1+ “like” T-  
 10 cells (**D**) were similarly identified and numbers (**E**) and percentages of IFN $\gamma$  secreting (**F**) cells determined. CD45+  
 11 CD11b high cells were separated in Ly6g negative and positive (g-MDSC) populations. Ly6g negative cells were  
 12 separated into Ly6c negative and positive (m-MDSC) populations, as described (8). The Ly6c negative population was  
 13 further separated into F4/80 positive populations and then separated into CD11c positive MHCII high and low  
 14 populations, as described (9).

15

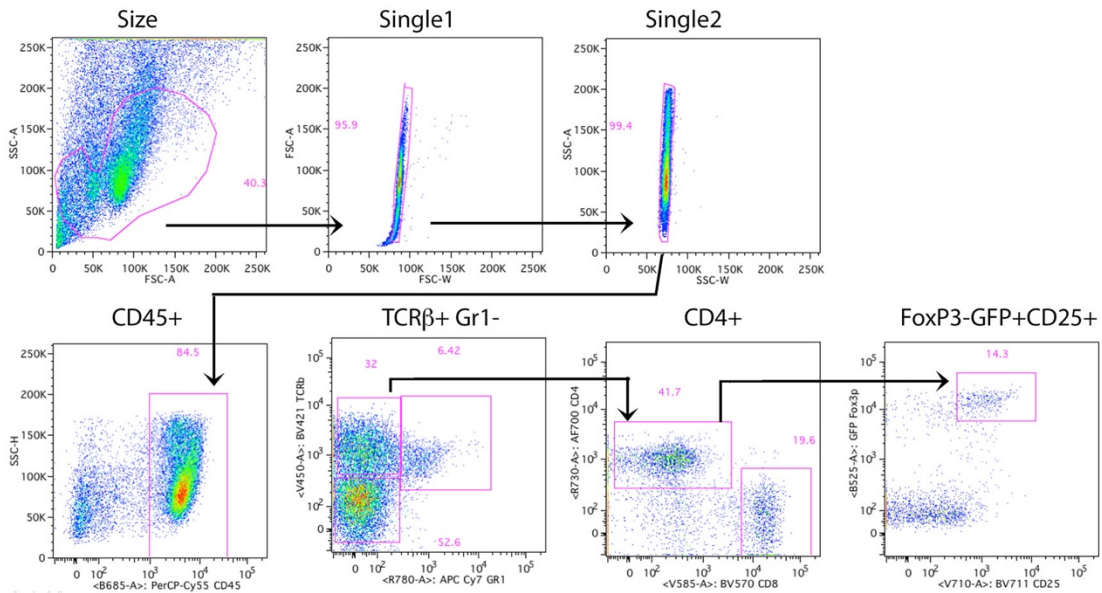

1

2 **Supplemental Figure 9: Gating strategy for CD4+ Treg cells**  $\beta$ 8 LLC tumors were established in C57BL/6  
 3 mice expressing GFP inserted into FoxP3 downstream of the endogenous Foxp3 STOP codon (B6.Cg-  
 4 Foxp3tm2Tch/J). Tumor infiltrating lymphoid cells harvested from  $\beta$ 8-LLC tumors at day 14 post injection from mice  
 5 treated with isotype or C6D4 (7 mg/kg) on days 0 and 7 underwent multicolor cell staining and analysis. Gating  
 6 strategy is shown to isolate CD45+ TCR $\beta$ + CD4+ FoxP3-GFP+ CD25+ cells.

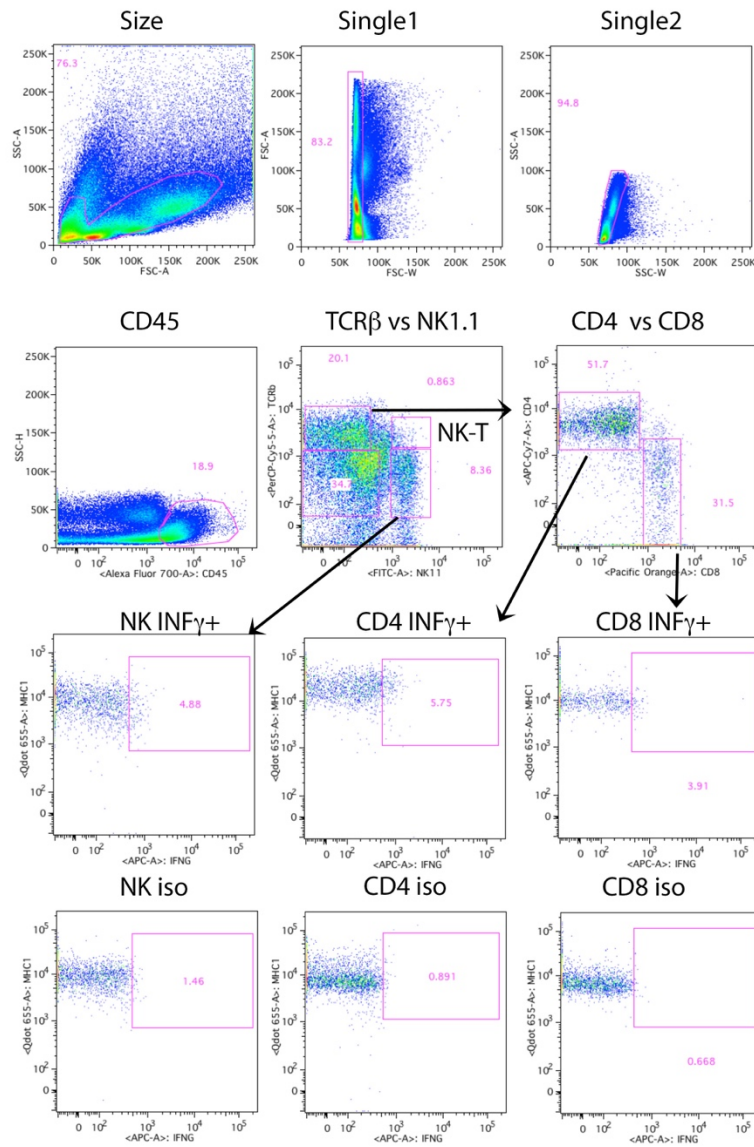

1 **Supplemental Figure 10: Gating strategy for IFN $\gamma$  secreting CD4+, CD8+ T-cells, and NK1.1+ cells**  
 2 Tumor infiltrating lymphoid cells from  $\beta$ 8-LLC tumors harvested at day 14 post injection from mice treated with  
 3 isotype or C6D4 (7 mg/kg) on days 0 and 7 underwent multicolor cell staining and analysis. Show is a representative  
 4 gating strategy to isolate CD45+ populations expressing either TCR $\beta$ , NK1.1 or both and the secretion of IFN $\gamma$  by the  
 5 NK1.1+ TCR $\beta$ - subset, the TCR $\beta$ + NK1.1-CD4+ subset and the TCR $\beta$ + NK1.1-CD8+ subset. The IFN $\gamma$  shifts are  
 6 similar as described for surface capture assays of stimulated ex vivo peripheral blood mononuclear cells (10). The  
 7 shifts shown above represent 1 hr of cytokine secretion from freshly isolated *unstimulated* ex-vivo tumor associated  
 8 immune cells.



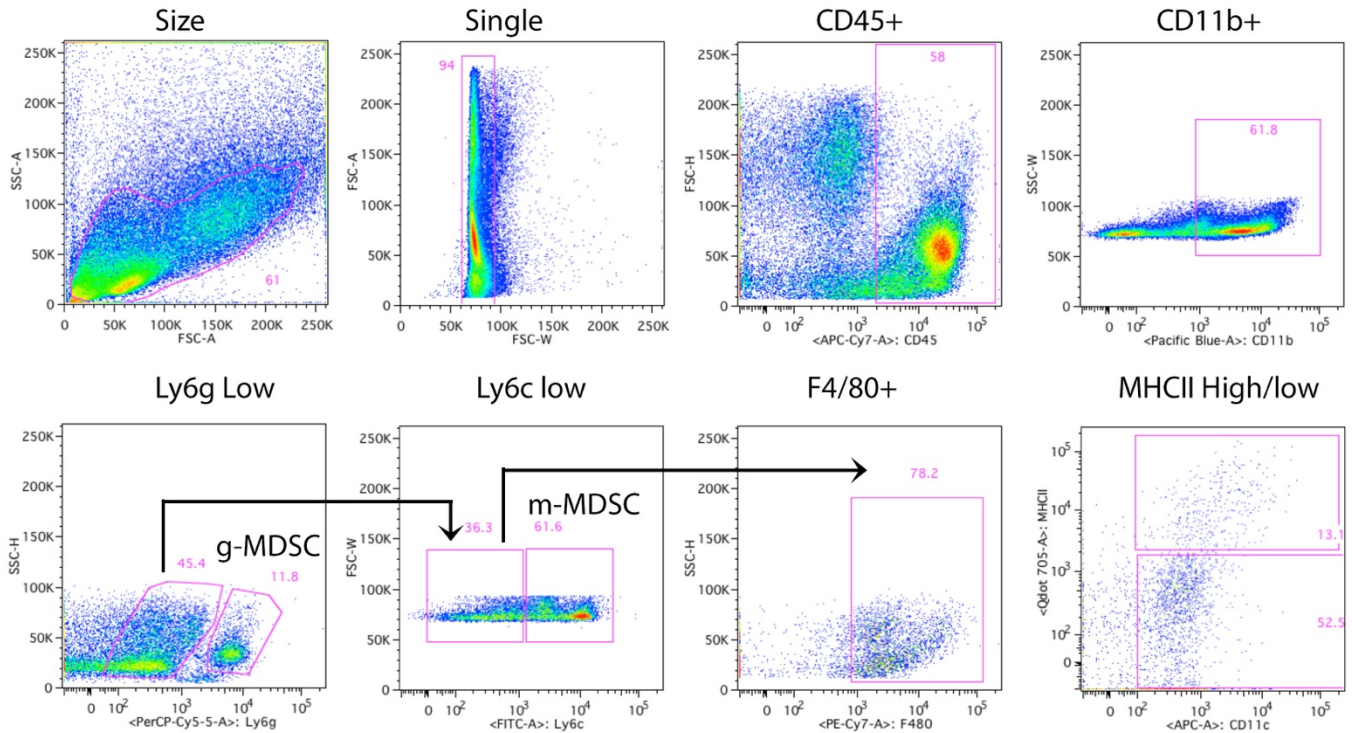

1

2 **Supplemental Figure 11 Gating strategy for tumor-associated macrophages, g-MDSC and m-MDSC**  
 3 Tumor associated macrophages (TAM) are a heterogeneous cell population that have been separated from resident  
 4 macrophages by surface expression of CD11b positive, Ly6C negative, Ly6G negative, CD11c high, and F4/80  
 5 high (9) and based on their respective high or low expression of MHCII can be associated with tumor elimination or  
 6 progression (11). Tumor infiltrating lymphoid cells from  $\beta$ 8-LLC tumors harvested at day 14 post injection from mice  
 7 treated with isotype or C6D4 (7mg/kg) on days 0 and 7 underwent multicolor cell staining and analysis. A  
 8 representative gating strategy for TAM is shown for CD45+ CD11b+ Ly6g low Ly6c low F4/80+ CD11c+ MHCII  
 9 high/low. The gating for granulocytic-MDSC (g-MDSC) and monocytic-MDSC (m-MDSC) are indicated.

10

11

12

13

14

15

1

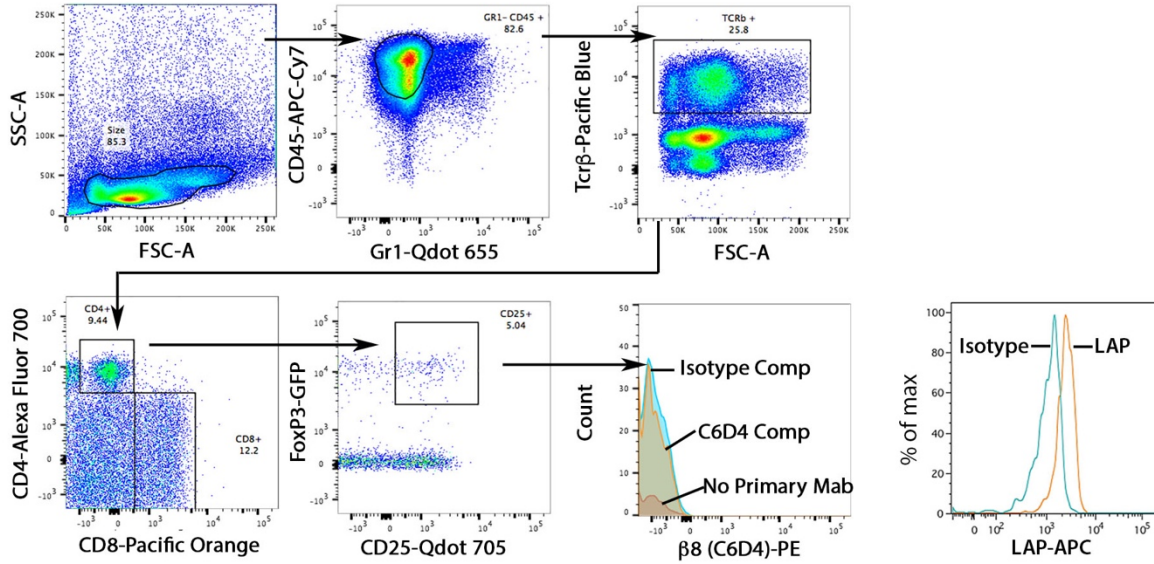

2

3 **Supplemental Figure 12 TGF-β1 is expressed on the cell surface but not integrin β8 on tumor**  
4 **associated CD4+, Treg from FoxP3-GFP mice** β8 LLC tumors were established in mice expressing GFP  
5 inserted into FoxP3 downstream of the endogenous Foxp3 STOP codon (B6.Cg-Foxp3tm2Tch/J). After tumors  
6 reached endpoint, tumor infiltrating lymphoid cells were isolated and stained for human β8 (C6D4-PE), CD45, TCRβ,  
7 CD4, CD8, Gr1, CD25 and the latency associated peptide (LAP) of TGF-β1. To determining specific staining for  
8 small amounts of cell surface β8, a 100-fold excess of unlabeled C6D4 (**C6D4 Comp**) or isotype control (**isotype**  
9 **comp**, anti-human β8 Mab clone B5) was added to C6D4-PE stained samples. A representative histogram overlay of  
10 isotype control and LAP stained FoxP3+CD25+ cells are shown. Shown is a representative experiment (n=3).

11

1  
2

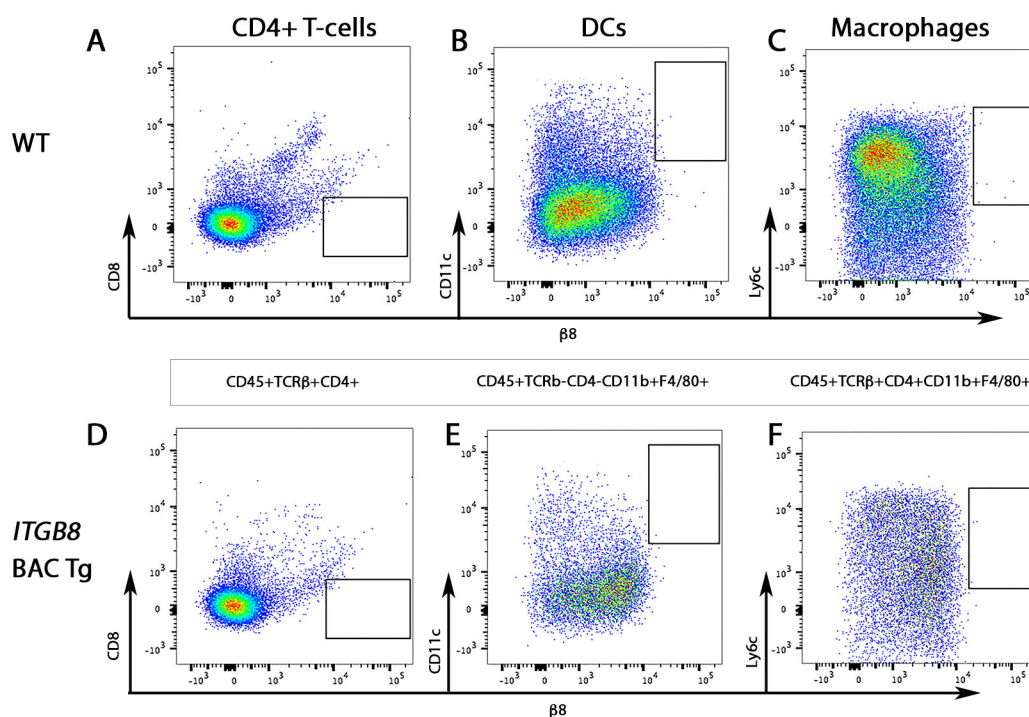

3 **Supplemental Figure 13: The integrin  $\beta 8$  subunit is not expressed by tumor associated CD4+,**  
4 **dendritic cells, or macrophages in humanized *ITGB8* BAC transgenic mice** Mice expressing human  $\beta 8$   
5 under the control of 70 kb of 5' and 30 kb of 3' *ITGB8* flanking regions, respectively, were crossed to *itgb8*  $-/-$  mice to  
6 create humanized *ITGB8* mice (1). These mice were used to confirm that a highly sensitive anti-human  $\beta 8$  antibody  
7 could not detect  $\beta 8$  in immune cells.  $\beta 8$  LLC cells were injected into the flank of humanized *ITGB8* mice or WT mice  
8 as a control. After tumors reached endpoint (day 14), tumor infiltrating lymphoid cells were isolated and stained for  
9 human  $\beta 8$  (68-PE), CD45, TCR $\beta$ , CD4, CD8, CD11b, CD11c, F4/80 and Ly6c. Gating strategies are indicated in a  
10 box between panels A-C and D-F. Boxes within the panels indicate the expected location where  $\beta 8$  positive CD4,  
11 dendritic cells and macrophages would be expected, based on isotype controls.

12  
13

1  
2  
3

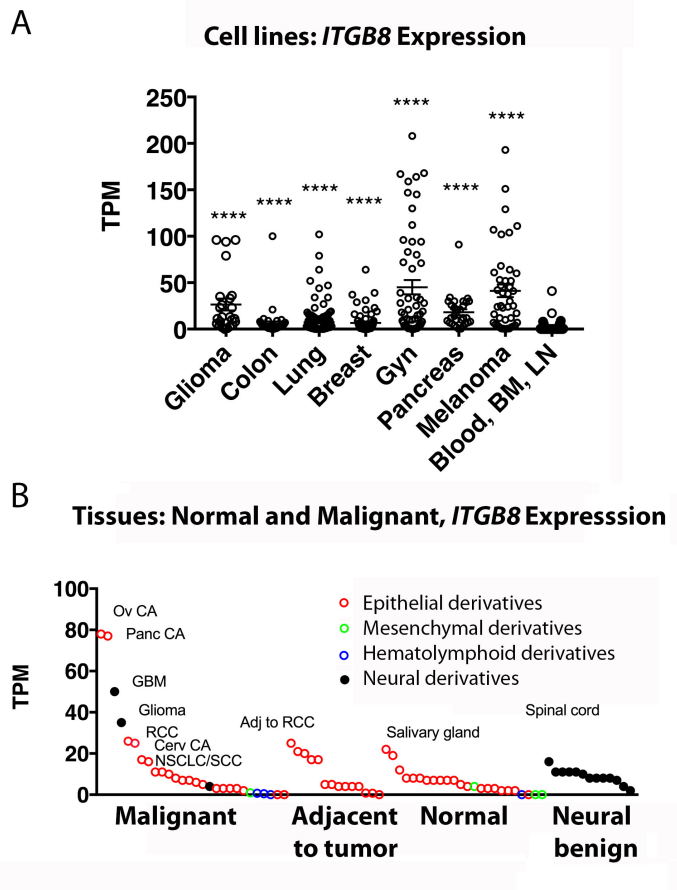

4 **Supplemental Figure 14: Expression of *ITGB8* across various human epithelial, neural and**  
5 **hematogenous and lymphoid-derived malignant cell lines** The EMBL-EBI expression database  
6 (<https://www.ebi.ac.uk/gxa/home>) was used to access commonly used human **A**) cell lines (12) and **B**) normal and  
7 tumor tissues. Reads are expressed as transcripts per million (TPM) for each **A**) cell line (glioma, n=24; colon, n=45;  
8 lung=146, breast, n=61; gynecologic (Gyn): ovary, uterus and cervix, n=55; pancreas, n=30, melanoma, n=44,  
9 hematolymphoid (blood, bone marrow (BM), lymph node (LN), n=92) and **B**) malignant and benign tissues  
10 (hematolymphoid, mesenchymal, epithelial, neural ) including bladder, brain, breast, gastrointestinal tract, kidney,  
11 liver and gall bladder, lung, head and neck, ovary, pancreas, prostate, melanoma, mesenchyme, thyroid, cervix and  
12 uterus). Color codes indicate red: epithelial derivatives; green: mesenchymal derivatives; blue, hematolymphoid  
13 derivatives; black: neural derivatives. Increased relative expression compared to blood, bone marrow and lymphoid  
14 derived cells line was determined by Kruskal-Wallis and Dunn's multiple comparison test and correlation (Pearson r)  
15 determined using Prism (V. 7.0b) \*\*\*\*p<0.0001

16

1

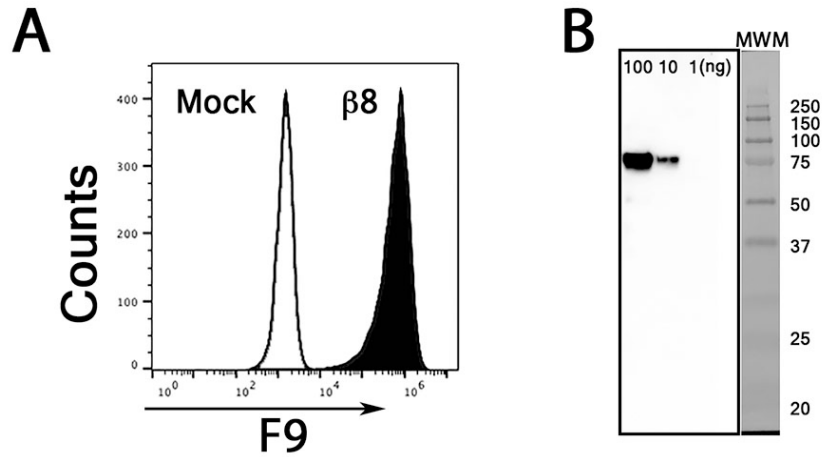

2  
3  
4

5 **Supplemental Figure 15: Antibody clone F9 specifically recognizes the integrin  $\beta 8$  subunit when**  
6 **expressed on transfected cells and in immunoblots** **A)** Transfected CHO cells either stably expressing the  
7 human  $\beta 8$  subunit or empty vector were stained with F9 or isotype control. Shown are histogram overlays. **B)**  
8 Recombinant  $\alpha v \beta 8$  ectodomain at various concentrations (100, 10, 1 ng/lane, non-reduced) was detected by antibody  
9 clone F9 by immunoblotting and luminescent detection. Shown are molecular weight markers (MWM). The expected  
10 migration of the  $\beta 8$  ectodomain is 80-90 kDa.

11

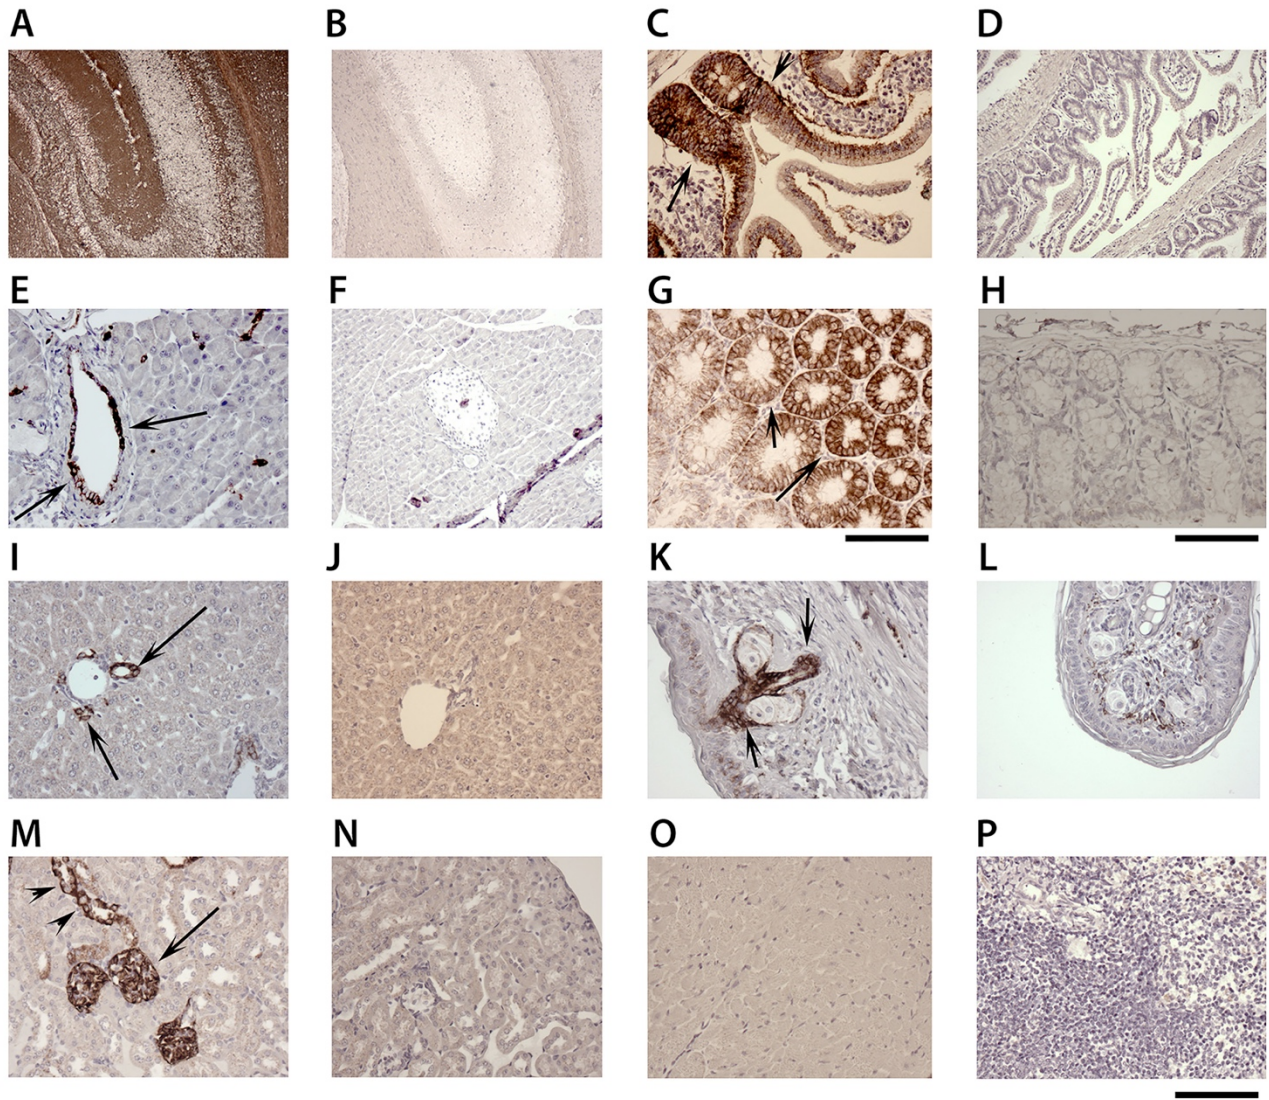

2 **Supplemental Figure 16: Antibody clone F9 specifically recognizes the human integrin  $\beta 8$  subunit and**  
 3 **not mouse  $\beta 8$  in brain and epithelial formalin-fixed paraffin embedded (FFPE) tissue** Staining of  
 4 *ITGB8* humanized mouse tissues (A, C, E, G, I, K, M, O, P) compared with wild-type mouse tissues (B, D,  
 5 F, H, J, L, N). A,B) hippocampus; C, D) small bowel E,F) pancreas; G,H) colon; I,J) liver; K,L) skin; M,  
 6 N) kidney, O) cardiac muscle P) spleen. Arrows indicate positively stained epithelial cells and structures.  
 7 Size bars below panel P = 150  $\mu$ m applies to all panels except G and H where the bars = 75  $\mu$ m.

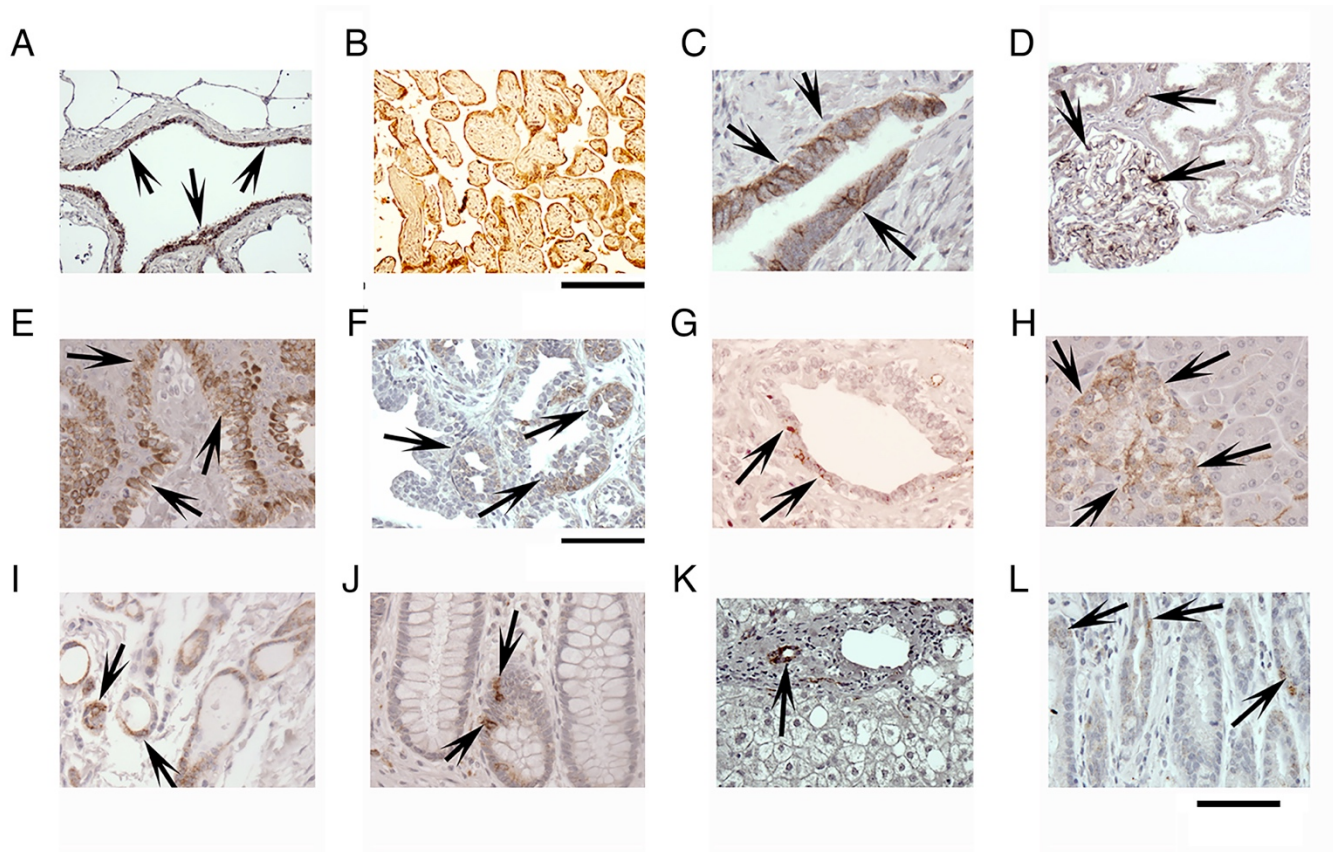

1 **Supplemental Figure 17: Clone F9 stains  $\beta 8$  in normal human epithelial and neural-derived cell types.**  
 2 **F9 immunostaining of archival FFPE tissues** A) lung (airway); B) placenta; C) fallopian tube; D) kidney;  
 3 E) skin; F) breast; G) pancreatic duct; H) pancreatic islet; I) prostate; J) Colon; K) liver bile duct; L)  
 4 stomach. Arrows indicate positively stained cells and structures. 75  $\mu\text{m}$  size bar in L refers to all panels  
 5 except B and F where it represents 150  $\mu\text{m}$ .  
 6

1

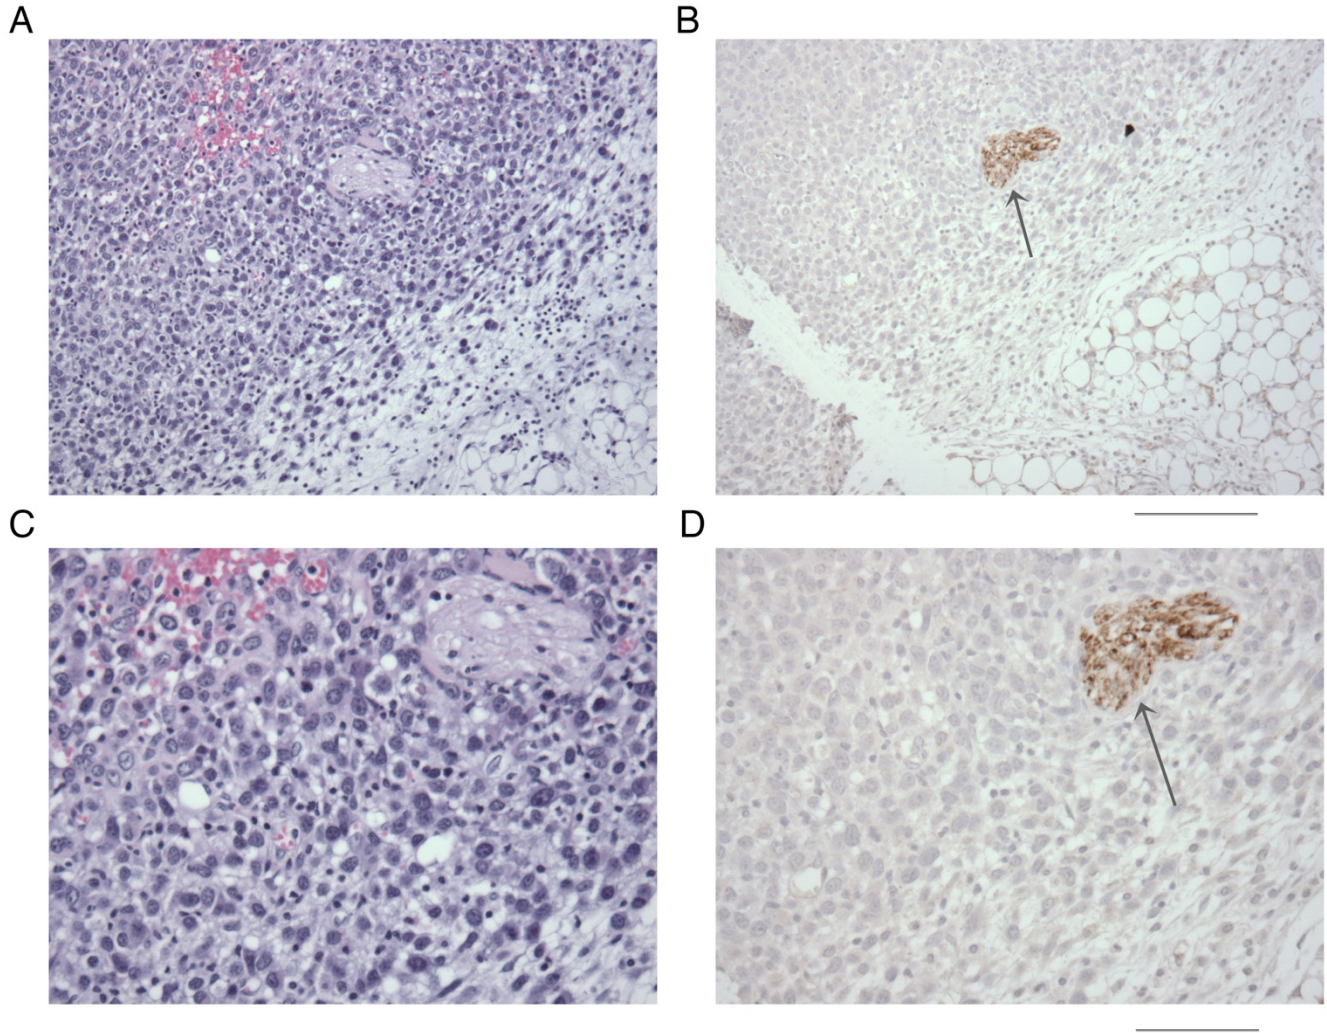

2

3 **Supplemental Figure 18: Clone F9 does not stain  $\beta 8$  in stromal or immune cells in LLC tumors**  
4 **growing in humanized *ITGB8* BAC transgenic mice** WT LLC cells were injected in the flanks of *ITGB8*  
5 BAC transgenic mice. After tumors reached 1000 mm<sup>3</sup> they were removed including the stromal surrounding  
6 the tumor and were formalin fixed and paraffin embedded. Sections were stained with anti- $\beta 8$ , clone F9  
7 which recognizes a human-specific epitope and thus will only recognize human  $\beta 8$  expressing host cells and  
8 not WT LLC cells which form the tumor and do not express  $\beta 8$ . Shown in **A, C** is a photomicrograph of an  
9 H&E stained section taken at 200X (**A**) and 400X (**C**) magnification and a photomicrograph of a F9  
10 immunostained section taken at 200X magnification (**B**), and 400X magnification (**D**), illustrating that the  
11 only structure or cell type stained is a nerve (arrow) and no other host stromal or immune cells. **A, B** =  
12 150  $\mu$ m, **C, D**) Bar = 75  $\mu$ m

13



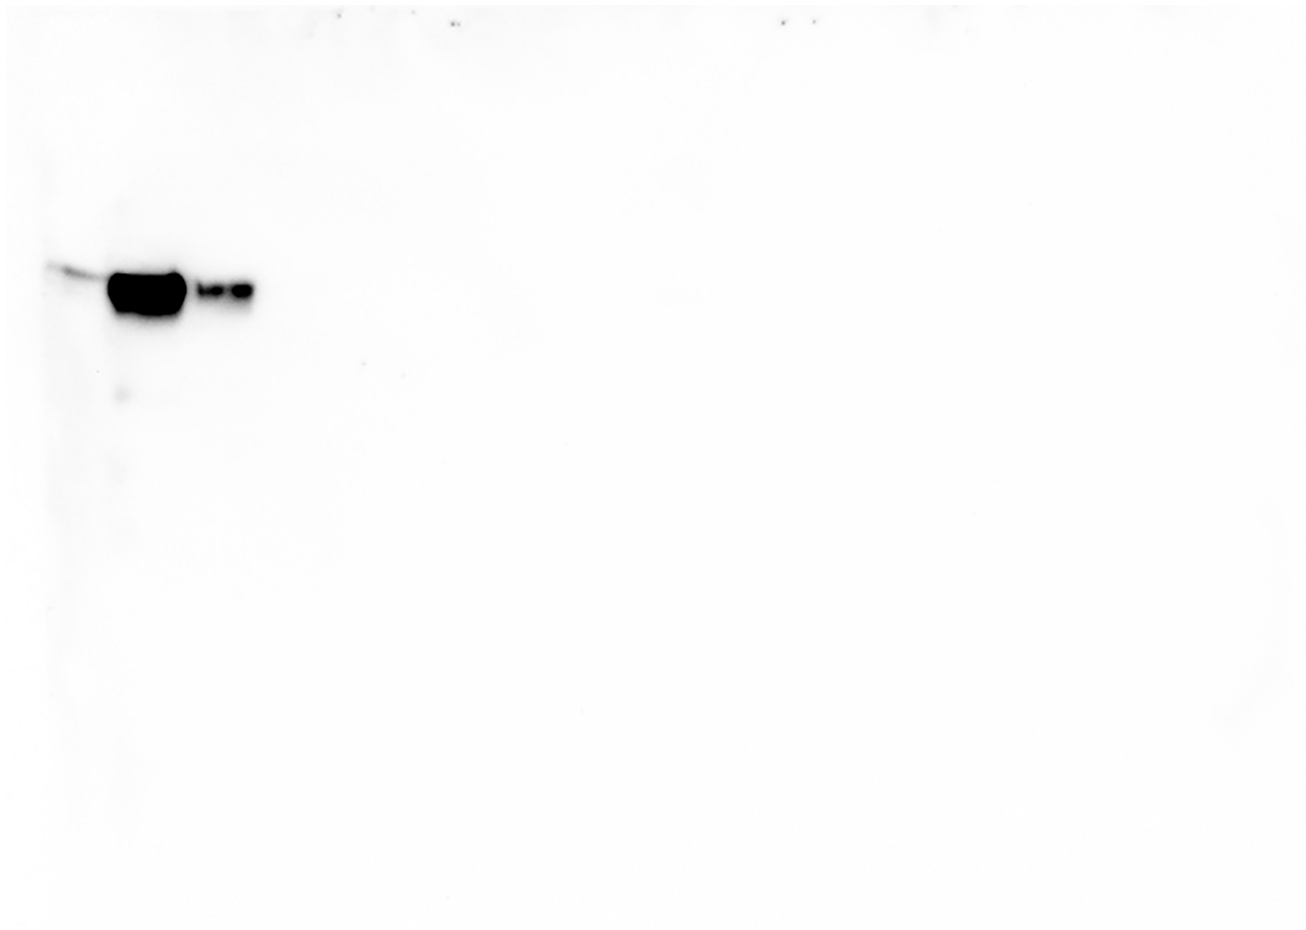

1  
2  
3  
4  
5  
6  
7  
8  
9

**Supplemental Figure 19: Full uncropped unedited immunoblot photomicrograph used for Supplemental Figure 15** Shown is a photomicrograph of the entire immunoblot of purified secreted  $\alpha v \beta 8$  detected with anti- $\beta 8$ , clone F9. Lanes 2 and 3 are cropped and shown in **Supplemental Figure 15**. A faint band in lane 1 represents sample spill-over.

| Macrophages         |                 |                   |          |               |                                                                       |                   |                    |              |             |
|---------------------|-----------------|-------------------|----------|---------------|-----------------------------------------------------------------------|-------------------|--------------------|--------------|-------------|
| Ensemble ID         | Gene Name       | log2Fold Change±1 | pvalue   | Padj (<0.005) | GeneDescription                                                       | MacC6D4 readcount | MacSV5 readcount   | MacC6D4_fpkm | MacSV5_fpkm |
| ENSMUSG0000040284   | <i>Gzmg</i>     | 4.4021            | 4.54E-12 | 1.60E-07      | granzyme_G                                                            | 117               | 6                  | 6.653203313  | 0.348867302 |
| ENSMUSG0000030147   | <i>Clec4b1</i>  | 2.4964            | 1.40E-06 | 0.0022405     | C-type_lectin_domain_family_4_member_b1                               | 128               | 25                 | 8.84539412   | 1.766490518 |
| ENSMUSG0000055170   | <i>Ifng</i>     | 2.4342            | 1.58E-06 | 0.0024205     | interferon_gamma                                                      | 147               | 30                 | 6.295335516  | 1.313671822 |
| ENSMUSG0000059256   | <i>Gzmd</i>     | 2.5743            | 7.39E-08 | 0.0004234     | granzyme_D                                                            | 275               | 51                 | 14.74566885  | 2.796185904 |
| ENSMUSG0000016498   | <i>Pdcd1lg2</i> | 2.7905            | 1.58E-09 | 2.78E-05      | programmed_cell_death_1_ligand_2                                      | 557               | 89                 | 17.50242033  | 2.859545454 |
| ENSMUSG0000004814   | <i>Ccl24</i>    | 2.0524            | 3.81E-06 | 0.0044784     | chemokine_(C-C_motif)_ligand_24                                       | 555               | 148                | 22.25609069  | 6.068504774 |
| ENSMUSG0000031443   | <i>F7</i>       | 2.2007            | 4.51E-07 | 0.0012243     | coagulation_factor_VII                                                | 1508              | 363                | 41.93057021  | 10.32048567 |
| ENSMUSG0000040809   | <i>Chil3</i>    | 2.0265            | 2.80E-06 | 0.0036324     | chitinase-like_3                                                      | 1642              | 446                | 55.14972479  | 15.3168387  |
| ENSMUSG0000046908   | <i>Ltb4r1</i>   | 2.1012            | 1.21E-06 | 0.0021412     | leukotriene_B4_receptor_1                                             | 1768              | 456                | 65.55839362  | 17.28920281 |
| ENSMUSG0000031444   | <i>F10</i>      | 1.9891            | 3.52E-06 | 0.0042793     | coagulation_factor_X                                                  | 3049              | 850                | 62.96589652  | 17.9486164  |
| ENSMUSG0000037868   | <i>Egr2</i>     | 2.2846            | 1.33E-07 | 0.00052299    | early_growth_response_2                                               | 3566              | 810                | 62.16779412  | 14.43887049 |
| ENSMUSG0000029417   | <i>Cxcl9</i>    | 2.1333            | 7.17E-07 | 0.0016872     | chemokine_(C-X-C_motif)_ligand_9                                      | 3742              | 944                | 66.58347587  | 17.17507956 |
| ENSMUSG0000061100   | <i>Retnla</i>   | 2.1309            | 7.05E-07 | 0.0016872     | resistin_like_alpha                                                   | 3811              | 963                | 329.4174351  | 85.11341245 |
| ENSMUSG0000049723   | <i>Mmp12</i>    | 2.2281            | 2.29E-07 | 0.00073447    | matrix_metalloproteinase_12                                           | 4978              | 1176               | 57.51322608  | 13.89262272 |
| ENSMUSG0000040950   | <i>Mgl2</i>     | 2.08              | 1.18E-06 | 0.0021412     | macrophage_galactose_N-acetyl-galactosamine_specific_lectin_2         | 5902              | 1545               | 186.5908163  | 49.94403504 |
| ENSMUSG0000018927   | <i>Ccl6</i>     | 1.9914            | 2.88E-06 | 0.0036324     | chemokine_(C-C_motif)_ligand_6                                        | 28824             | 8024               | 1034.666942  | 294.5108694 |
| ENSMUSG0000001506   | <i>Col1a1</i>   | -2.0178           | 2.42E-06 | 0.0032867     | collagen_type_I_alpha_1                                               | 965               | 4326               | 8.411654701  | 38.55713194 |
| ENSMUSG0000042436   | <i>Mfap4</i>    | -2.1444           | 1.74E-06 | 0.0025623     | microfibrillar-associated_protein_4                                   | 117               | 573                | 3.416814583  | 17.11016728 |
| ENSMUSG0000027750   | <i>Postn</i>    | -2.1945           | 1.09E-06 | 0.0021292     | periostin_osteoblast_specific_factor                                  | 113               | 573                | 1.340601497  | 6.950882737 |
| ENSMUSG0000052316   | <i>Lrrc15</i>   | -2.3483           | 8.30E-07 | 0.0017525     | leucine_rich_repeat_containing_15                                     | 51                | 288                | 0.496460238  | 2.866624884 |
| ENSMUSG0000028364   | <i>Tnc</i>      | -2.3635           | 1.18E-07 | 0.00051862    | tenascin_C                                                            | 163               | 929                | 1.185690166  | 6.909767122 |
| ENSMUSG0000031375   | <i>Bgn</i>      | -2.4284           | 8.40E-08 | 0.0004234     | biglycan                                                              | 110               | 656                | 2.132756905  | 13.00518679 |
| ENSMUSG0000042254   | <i>Cilp</i>     | -2.457            | 2.39E-08 | 0.00019502    | cartilage_intermediate_layer_protein_nucleotide_pyrophosphohydrolase  | 315               | 1915               | 3.920644268  | 24.371359   |
| ENSMUSG0000073599   | <i>Ecscr</i>    | -2.4857           | 1.94E-06 | 0.002731      | endothelial_cell_surface_expressed_chemotaxis_and_apoptosis_regulator | 22                | 137                | 1.020813269  | 6.499923962 |
| ENSMUSG0000095079   | <i>Igha</i>     | -2.6643           | 8.45E-07 | 0.0017525     | immunoglobulin_heavy_constant_alpha                                   | 18                | 127                | 0.899830652  | 6.49166473  |
| ENSMUSG0000021260   | <i>Hhip1</i>    | -3.4608           | 1.39E-08 | 0.00016323    | hedgehog_interacting_protein-like_1                                   | 9                 | 111                | 0.178584433  | 2.252102491 |
| <b>β8 LLC cells</b> |                 |                   |          |               |                                                                       |                   |                    |              |             |
| ID                  | Gene Name       | log2Fold Change±1 | pvalue   | padj<0.005    | GeneDescription                                                       | LLCC6D4 readcount | LLCSV5_r readcount | LLCC6D4_fpkm | LLCSV5_fpkm |
| None                |                 |                   |          |               |                                                                       |                   |                    |              |             |
| <b>CD8+ T-cells</b> |                 |                   |          |               |                                                                       |                   |                    |              |             |
| ID                  | Gene Name       | log2Fold Change±1 | pvalue   | padj<0.005    | GeneDescription                                                       | CD8C6D4 readcount | CD8Sv5_readcount   | CD8C6D4_fpkm | CD8Sv5_fpkm |
| ENSMUSG0000022226   | <i>Mcpt2</i>    | -2.8907           | 3.72E-10 | 4.38E-06      | mast_cell_protease_2                                                  | 96                | 665                | 5.36092199   | 41.52856181 |
| ENSMUSG0000076596   | <i>Igkv3-10</i> | -3.4207           | 2.17E-10 | 3.83E-06      | immunoglobulin_kappa_variable_3-10                                    | 18                | 181                | 2.741637247  | 30.82996649 |
| ENSMUSG0000095583   | <i>Ighv14-2</i> | -3.4875           | 4.43E-12 | 1.56E-07      | immunoglobulin_heavy_variable_14-2                                    | 34                | 357                | 5.252418049  | 61.67449121 |
| <b>CD4+ T-cells</b> |                 |                   |          |               |                                                                       |                   |                    |              |             |
| ID                  | Gene Name       | log2Fold Change±1 | pvalue   | padj<0.005    | GeneDescription                                                       | CD4C6D4 readcount | CD4Sv5_readcount   | CD4C6D4_fpkm | CD4Sv5_fpkm |
| ENSMUSG0000076613   | <i>Ighg2b</i>   | -2.3543           | 3.19E-07 | 0.00093823    | immunoglobulin_heavy_constant_gamma_2B                                | 86                | 436                | 4.905970515  | 25.53580661 |
| ENSMUSG0000069919   | <i>Hba-a1</i>   | -2.5196           | 2.08E-08 | 0.00010457    | hemoglobin_alpha_adult_chain_1                                        | 145               | 824                | 11.95194766  | 69.73238209 |
| ENSMUSG0000052305   | <i>Hbb-bs</i>   | -2.6176           | 7.81E-09 | 5.51E-05      | hemoglobin_beta_adult_s_chain                                         | 120               | 730                | 8.886883876  | 55.50444039 |
| ENSMUSG0000073940   | <i>Hbb-bt</i>   | -3.0793           | 2.32E-07 | 0.00074436    | hemoglobin_beta_adult_t_chain                                         | 11                | 93                 | 0.901540448  | 7.825499874 |
| ENSMUSG0000022226   | <i>Mcpt2</i>    | -5.1149           | 3.58E-19 | 1.26E-14      | mast_cell_protease_2                                                  | 12                | 416                | 0.712048986  | 25.34303165 |

**Supplemental Table 2: Significantly differentially expressed genes**

| Macrophages     |            | Up                                                   |           |                      |             |             |                                     |          |
|-----------------|------------|------------------------------------------------------|-----------|----------------------|-------------|-------------|-------------------------------------|----------|
| Category        | ID         | Description                                          | GeneRatio | BgRatio <sup>4</sup> | pvalue      | padj        | geneID                              | Count>3  |
| BP <sup>1</sup> | GO:0030595 | leukocyte chemotaxis                                 | 5/15      | 190/20349            | 1.87E-07    | 0.000139988 | <i>Ccl24/Ccl6/Cxcl9/F7/lfng</i>     | 5        |
| BP              | GO:0060326 | cell chemotaxis                                      | 5/15      | 258/20349            | 8.53E-07    | 0.000318655 | <i>Ccl24/Ccl6/Cxcl9/F7/lfng</i>     | 5        |
| BP              | GO:0050900 | leukocyte migration                                  | 5/15      | 303/20349            | 1.88E-06    | 0.000468595 | <i>Ccl24/Ccl6/Cxcl9/F7/lfng</i>     | 5        |
| BP              | GO:0019221 | cytokine-mediated signaling pathway                  | 5/15      | 331/20349            | 2.90E-06    | 0.000541977 | <i>Ccl24/Ccl6/Cxcl9/Mmp12/lfng</i>  | 5        |
| BP              | GO:0048247 | lymphocyte chemotaxis                                | 3/15      | 49/20349             | 5.85E-06    | 0.000774444 | <i>Ccl24/Ccl6/Cxcl9</i>             | 3        |
| BP              | GO:0070098 | chemokine-mediated signaling pathway                 | 3/15      | 50/20349             | 6.22E-06    | 0.000774444 | <i>Ccl24/Ccl6/Cxcl9</i>             | 3        |
| BP              | GO:0071346 | cellular response to interferon-gamma                | 3/15      | 70/20349             | 1.72E-05    | 0.001837581 | <i>Ccl24/Ccl6/lfng</i>              | 3        |
| BP              | GO:0072676 | lymphocyte migration                                 | 3/15      | 81/20349             | 2.67E-05    | 0.002493937 | <i>Ccl24/Ccl6/Cxcl9</i>             | 3        |
| BP              | GO:0030593 | neutrophil chemotaxis                                | 3/15      | 87/20349             | 3.31E-05    | 0.002646226 | <i>Ccl24/Ccl6/lfng</i>              | 3        |
| BP              | GO:0034341 | response to interferon-gamma                         | 3/15      | 89/20349             | 3.54E-05    | 0.002646226 | <i>Ccl24/Ccl6/lfng</i>              | 3        |
| BP              | GO:1990266 | neutrophil migration                                 | 3/15      | 103/20349            | 5.48E-05    | 0.003723133 | <i>Ccl24/Ccl6/lfng</i>              | 3        |
| BP              | GO:0071621 | granulocyte chemotaxis                               | 3/15      | 108/20349            | 6.32E-05    | 0.00393109  | <i>Ccl24/Ccl6/lfng</i>              | 3        |
| BP              | GO:0097530 | granulocyte migration                                | 3/15      | 126/20349            | 9.99E-05    | 0.005739542 | <i>Ccl24/Ccl6/lfng</i>              | 3        |
| BP              | GO:0002687 | positive regulation of leukocyte migration           | 3/15      | 133/20349            | 0.000117259 | 0.006256631 | <i>Ccl24/Cxcl9/F7</i>               | 3        |
| BP              | GO:0097529 | myeloid leukocyte migration                          | 3/15      | 176/20349            | 0.000268088 | 0.012473238 | <i>Ccl24/Ccl6/lfng</i>              | 3        |
| BP              | GO:0002685 | regulation of leukocyte migration                    | 3/15      | 179/20349            | 0.000281738 | 0.012473238 | <i>Ccl24/Cxcl9/F7</i>               | 3        |
| BP              | GO:0030335 | positive regulation of cell migration                | 4/15      | 458/20349            | 0.000283862 | 0.012473238 | <i>Ccl24/Cxcl9/F7/lfng</i>          | 4        |
| BP              | GO:2000147 | positive regulation of cell motility                 | 4/15      | 476/20349            | 0.000328755 | 0.013643339 | <i>Ccl24/Cxcl9/F7/lfng</i>          | 4        |
| BP              | GO:0051272 | positive regulation of cellular component movement   | 4/15      | 490/20349            | 0.000367052 | 0.014430939 | <i>Ccl24/Cxcl9/F7/lfng</i>          | 4        |
| BP              | GO:0051607 | defense response to virus                            | 3/15      | 202/20349            | 0.000401559 | 0.014549765 | <i>Cxcl9/Mmp12/lfng</i>             | 3        |
| BP              | GO:0009615 | response to virus                                    | 3/15      | 245/20349            | 0.000704783 | 0.021936361 | <i>Cxcl9/Mmp12/lfng</i>             | 3        |
| BP              | GO:0032103 | positive regulation of response to external stimulus | 3/15      | 268/20349            | 0.000914094 | 0.027313142 | <i>Ccl24/Cxcl9/F7</i>               | 3        |
| BP              | GO:0050678 | regulation of epithelial cell proliferation          | 3/15      | 321/20349            | 0.001537087 | 0.039593236 | <i>Ccl24/Mmp12/lfng</i>             | 3        |
| BP              | GO:0042060 | wound healing                                        | 3/15      | 351/20349            | 0.001984594 | 0.044923997 | <i>F7/F10/Mmp12</i>                 | 3        |
| MF <sup>2</sup> | GO:0008009 | chemokine activity                                   | 3/17      | 39/20291             | 4.38E-06    | 0.000181786 | <i>Ccl24/Ccl6/Cxcl9</i>             | 3        |
| MF              | GO:0042379 | chemokine receptor binding                           | 3/17      | 52/20291             | 1.05E-05    | 0.000181786 | <i>Ccl24/Ccl6/Cxcl9</i>             | 3        |
| MF              | GO:0004252 | serine-type endopeptidase activity                   | 4/17      | 188/20291            | 1.55E-05    | 0.000181786 | <i>F7/F10/Gzmg/Gzmd</i>             | 4        |
| MF              | GO:0004175 | endopeptidase activity                               | 5/17      | 430/20291            | 2.09E-05    | 0.000181786 | <i>F7/F10/Gzmg/Mmp12/Gzmd</i>       | 5        |
| MF              | GO:0048018 | receptor ligand activity                             | 5/17      | 451/20291            | 2.63E-05    | 0.000181786 | <i>Ccl24/Ccl6/Cxcl9/lfng/Retnla</i> | 5        |
| MF              | GO:0005125 | cytokine activity                                    | 4/17      | 216/20291            | 2.67E-05    | 0.000181786 | <i>Ccl24/Ccl6/Cxcl9/lfng</i>        | 4        |
| MF              | GO:0008236 | serine-type peptidase activity                       | 4/17      | 217/20291            | 2.71E-05    | 0.000181786 | <i>F7/F10/Gzmg/Gzmd</i>             | 4        |
| MF              | GO:0017171 | serine hydrolase activity                            | 4/17      | 222/20291            | 2.97E-05    | 0.000181786 | <i>F7/F10/Gzmg/Gzmd</i>             | 4        |
| MF              | GO:0030545 | receptor regulator activity                          | 5/17      | 484/20291            | 3.69E-05    | 0.000200987 | <i>Ccl24/Ccl6/Cxcl9/lfng/Retnla</i> | 5        |
| MF              | GO:0005126 | cytokine receptor binding                            | 4/17      | 285/20291            | 7.85E-05    | 0.000384715 | <i>Ccl24/Ccl6/Cxcl9/lfng</i>        | 4        |
| MF              | GO:0001664 | G-protein coupled receptor binding                   | 3/17      | 270/20291            | 0.001379912 | 0.005634639 | <i>Ccl24/Ccl6/Cxcl9</i>             | 3        |
| Macrophages     |            | Down                                                 |           |                      |             |             |                                     |          |
| Category        | ID         | Description                                          | GeneRatio | BgRatio              | pvalue      | padj        | geneID                              | Count >3 |
| BP              | GO:0030335 | positive regulation of cell migration                | 4/11      | 458/20349            | 7.37E-05    | 0.007781287 | <i>Col1a1/Postn/Ednra/Lrrc15</i>    | 4        |
| BP              | GO:2000147 | positive regulation of cell motility                 | 4/11      | 476/20349            | 8.56E-05    | 0.007781287 | <i>Col1a1/Postn/Ednra/Lrrc15</i>    | 4        |
| BP              | GO:0051272 | positive regulation of cellular component movement   | 4/11      | 490/20349            | 9.58E-05    | 0.007781287 | <i>Col1a1/Postn/Ednra/Lrrc15</i>    | 4        |
| BP              | GO:0030198 | extracellular matrix organization                    | 3/11      | 206/20349            | 0.000158897 | 0.007781287 | <i>Col1a1/Postn/Mfap4</i>           | 3        |
| BP              | GO:0043062 | extracellular structure organization                 | 3/11      | 207/20349            | 0.000161186 | 0.007781287 | <i>Col1a1/Postn/Mfap4</i>           | 3        |
| BP              | GO:0001649 | osteoblast differentiation                           | 3/11      | 209/20349            | 0.000165828 | 0.007781287 | <i>Col1a1/gfbp5/Tnc</i>             | 3        |
| BP              | GO:0071214 | cellular response to abiotic stimulus                | 3/11      | 217/20349            | 0.000185269 | 0.007781287 | <i>Col1a1/Ednra/Mfap4</i>           | 3        |
| BP              | GO:0104004 | cellular response to environmental stimulus          | 3/11      | 217/20349            | 0.000185269 | 0.007781287 | <i>Col1a1/Ednra/Mfap4</i>           | 3        |

|                     |             |                                                         |           |           |             |             |                                           |         |   |
|---------------------|-------------|---------------------------------------------------------|-----------|-----------|-------------|-------------|-------------------------------------------|---------|---|
| BP                  | GO:0071496  | cellular response to external stimulus                  | 3/11      | 226/20349 | 0.000208849 | 0.008040669 | <i>Col1a1/Postn/Ednra</i>                 | 3       | 1 |
| BP                  | GO:0007162  | negative regulation of cell adhesion                    | 3/11      | 252/20349 | 0.000287714 | 0.010224916 | <i>Col1a1/Postn/Tnc</i>                   | 3       | 2 |
| BP                  | GO:0001503  | ossification                                            | 3/11      | 378/20349 | 0.000939142 | 0.021323137 | <i>Col1a1/Igfbp5/Tnc</i>                  | 3       | 3 |
| CC <sup>3</sup>     | GO:0005578  | proteinaceous extracellular matrix                      | 6/11      | 348/20585 | 9.62E-09    | 2.60E-07    | <i>Col1a1/Postn/Tnc/Bgn/Cilp/Mfap4</i>    | 6       | 4 |
| CC                  | GO:0044420  | extracellular matrix component                          | 3/11      | 129/20585 | 3.82E-05    | 0.000516248 | <i>Col1a1/Tnc/Mfap4</i>                   | 3       | 5 |
| MF                  | GO:0001968  | fibronectin binding                                     | 3/9       | 30/20291  | 2.44E-07    | 5.60E-06    | <i>Igfbp5/Tnc/Lrrc15</i>                  | 3       | 6 |
| <b>β8 LLC cells</b> | <b>Up</b>   |                                                         |           |           |             |             |                                           |         | 7 |
| Category            | ID          | Description                                             | GeneRatio | BgRatio   | pvalue      | padj        | geneID                                    | Count>3 |   |
| None                |             |                                                         |           |           |             |             |                                           |         |   |
| <b>β8 LLC cells</b> | <b>Down</b> |                                                         |           |           |             |             |                                           |         | 8 |
| Category            | ID          | Description                                             | GeneRatio | BgRatio   | pvalue      | padj        | geneID                                    | Count>3 |   |
| None                |             |                                                         |           |           |             |             |                                           |         |   |
| <b>CD8+ T-cells</b> | <b>Up</b>   |                                                         |           |           |             |             |                                           |         |   |
| Category            | ID          | Description                                             | GeneRatio | BgRatio   | pvalue      | padj        | geneID                                    | Count>3 |   |
| None                |             |                                                         |           |           |             |             |                                           |         |   |
| <b>CD8+ T-cells</b> | <b>Down</b> |                                                         |           |           |             |             |                                           |         |   |
| Category            | ID          | Description                                             | GeneRatio | BgRatio   | pvalue      | padj        | geneID                                    | Count>3 |   |
| None                |             |                                                         |           |           |             |             |                                           |         |   |
| <b>CD4+ T-cells</b> | <b>Up</b>   |                                                         |           |           |             |             |                                           |         |   |
| Category            | ID          | Description                                             | GeneRatio | BgRatio   | pvalue      | padj        | geneID                                    | Count>3 |   |
| None                |             |                                                         |           |           |             |             |                                           |         |   |
| <b>CD4+ T-cells</b> | <b>Down</b> |                                                         |           |           |             |             |                                           |         |   |
| Category            | ID          | Description                                             | GeneRatio | BgRatio   | pvalue      | padj        | geneID                                    | Count>3 |   |
| None                |             |                                                         |           |           |             |             |                                           |         |   |
| BP                  | GO:0048821  | erythrocyte development                                 | 3/4       | 33/20349  | 1.55E-08    | 3.73E-07    | <i>Hbb-b1/Hbb-b2/Hba-a1</i>               | 3       |   |
| BP                  | GO:0061515  | myeloid cell development                                | 3/4       | 68/20349  | 1.42E-07    | 1.71E-06    | <i>Hbb-b1/Hbb-b2/Hba-a1</i>               | 3       |   |
| BP                  | GO:0030218  | erythrocyte differentiation                             | 3/4       | 117/20349 | 7.38E-07    | 5.81E-06    | <i>Hbb-b1/Hbb-b2/Hba-a1</i>               | 3       |   |
| BP                  | GO:0034101  | erythrocyte homeostasis                                 | 3/4       | 128/20349 | 9.68E-07    | 5.81E-06    | <i>Hbb-b1/Hbb-b2/Hba-a1</i>               | 3       |   |
| BP                  | GO:0002262  | myeloid cell homeostasis                                | 3/4       | 161/20349 | 1.93E-06    | 9.28E-06    | <i>Hbb-b1/Hbb-b2/Hba-a1</i>               | 3       |   |
| BP                  | GO:0048872  | homeostasis of number of cells                          | 3/4       | 294/20349 | 1.18E-05    | 4.05E-05    | <i>Hbb-b1/Hbb-b2/Hba-a1</i>               | 3       |   |
| BP                  | GO:0030099  | myeloid cell differentiation                            | 3/4       | 373/20349 | 2.41E-05    | 7.23E-05    | <i>Hbb-b1/Hbb-b2/Hba-a1</i>               | 3       |   |
| CC                  | GO:0044445  | cytosolic part                                          | 5/6       | 240/20585 | 1.23E-09    | 1.11E-08    | <i>Hbb-b1/Hbb-b2/Hbb-bs/Hba-a1/Hbb-bt</i> | 5       |   |
| CC                  | GO:0072562  | blood microparticle                                     | 5/6       | 107/20585 | 2.70E-06    | 1.22E-05    | <i>Hbb-bs/Hba-a1/Hbb-bt</i>               | 3       |   |
| MF                  | GO:0019825  | oxygen binding                                          | 5/6       | 19/20291  | 8.22E-12    | 1.07E-10    | <i>Hbb-b2/Hbb-bs/Hba-a1/Hbb-bt</i>        | 4       |   |
| MF                  | GO:0004601  | peroxidase activity                                     | 5/6       | 41/20291  | 1.52E-07    | 8.21E-07    | <i>Hbb-bs/Hba-a1/Hbb-bt</i>               | 3       |   |
| MF                  | GO:0016684  | oxidoreductase activity, acting on peroxide as acceptor | 5/6       | 44/20291  | 1.89E-07    | 8.21E-07    | <i>Hbb-bs/Hba-a1/Hbb-bt</i>               | 3       |   |
| MF                  | GO:0016209  | antioxidant activity                                    | 5/6       | 79/20291  | 1.13E-06    | 3.66E-06    | <i>Hbb-bs/Hba-a1/Hbb-bt</i>               | 3       |   |

<sup>1</sup>CF, Biologic Function

<sup>2</sup>MF, Molecular Function

<sup>3</sup>CC, Cellular Component

## 9 Supplemental Table 2: Gene Ontology Enrichment

10

### Supplemental References:

1. Minagawa S, Lou J, Seed RI, Cormier A, Wu S, Cheng Y, et al. Selective targeting of TGF-beta activation to treat fibroinflammatory airway disease. *Sci Transl Med*. 2014;6(241):241ra79.
2. Rimm DL, Han G, Taube JM, Yi ES, Bridge JA, Flieder DB, et al. A Prospective, Multi-institutional, Pathologist-Based Assessment of 4 Immunohistochemistry Assays for PD-L1 Expression in Non-Small Cell Lung Cancer. *JAMA Oncol*. 2017;3(8):1051-8.
3. Roach C, Zhang N, Corigliano E, Jansson M, Toland G, Ponto G, et al. Development of a Companion Diagnostic PD-L1 Immunohistochemistry Assay for Pembrolizumab Therapy in Non-Small-cell Lung Cancer. *Appl Immunohistochem Mol Morphol*. 2016;24(6):392-7.
4. Kim H, Kwon HJ, Park SY, Park E, and Chung JH. PD-L1 immunohistochemical assays for assessment of therapeutic strategies involving immune checkpoint inhibitors in non-small cell lung cancer: a comparative study. *Oncotarget*. 2017;8(58):98524-32.
5. Mazzocca A, Fransvea E, Lavezzari G, Antonaci S, and Giannelli G. Inhibition of transforming growth factor beta receptor I kinase blocks hepatocellular carcinoma growth through neo-angiogenesis regulation. *Hepatology*. 2009;50(4):1140-51.
6. Casazza A, Laoui D, Wenes M, Rizzolio S, Bassani N, Mambretti M, et al. Impeding macrophage entry into hypoxic tumor areas by Sema3A/Nrp1 signaling blockade inhibits angiogenesis and restores antitumor immunity. *Cancer Cell*. 2013;24(6):695-709.
7. Xiong JP, Stehle T, Diefenbach B, Zhang R, Dunker R, Scott DL, et al. Crystal structure of the extracellular segment of integrin alpha Vbeta3. *Science*. 2001;294(5541):339-45.
8. Su X, Esser AK, Amend SR, Xiang J, Xu Y, Ross MH, et al. Antagonizing Integrin beta3 Increases Immunosuppression in Cancer. *Cancer research*. 2016;76(12):3484-95.
9. Franklin RA, Liao W, Sarkar A, Kim MV, Bivona MR, Liu K, et al. The cellular and molecular origin of tumor-associated macrophages. *Science*. 2014;344(6186):921-5.
10. Desombere I, Meuleman P, Rigole H, Willems A, Irsch J, and Leroux-Roels G. The interferon gamma secretion assay: a reliable tool to study interferon gamma production at the single cell level. *J Immunol Methods*. 2004;286(1-2):167-85.
11. Wang B, Li Q, Qin L, Zhao S, Wang J, and Chen X. Transition of tumor-associated macrophages from MHC class II(hi) to MHC class II(low) mediates tumor progression in mice. *BMC Immunol*. 2011;12:43.
12. Klijn C, Durinck S, Stawiski EW, Haverty PM, Jiang Z, Liu H, et al. A comprehensive transcriptional portrait of human cancer cell lines. *Nat Biotechnol*. 2015;33(3):306-12.
